# Supplementary material
Source: MDPI journal article supplement (https://www.mdpi.com/2312-7481/4/3/32)

## Supplementary Materials

### Structure Confirmation and Evaluation of a Nonsteroidal Inhibitor of 17 $\beta$ -Hydroxysteroid Dehydrogenase Type 10

#### Content:

- 1) Listing of  $^1\text{H}$  and  $^{13}\text{C}$  NMR data reported in literature for compound **2**
- 2) Crystal data and structure refinement for CHUL08 (**2**)
- 3) NMR spectra for compound **2** in DMSO- $d_6$  ( $^1\text{H}$  NMR,  $^{13}\text{C}$  NMR (APT), COSY, HSQC and HMBC)

**(1) Listing of  $^1\text{H}$  and  $^{13}\text{C}$  NMR data reported in literature for compound 2, but without assignation**

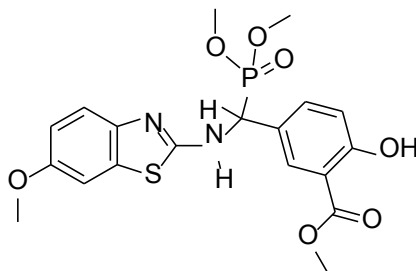

*From the patent (US 2015/0065463 A1):*

**$^1\text{H}$  NMR (500 MHz) in DMSO- $d_6$  ( $\delta$  in ppm):** 10.48 (s, 1H), 7.91-7.90 (m, 1H), 7.66-7.64 (m, 1H), 7.23-7.22 (m, 1H), 7.06 (d,  $J$  = 10 Hz), 6.95 (d,  $J$  = 10.0 Hz), 6.89-6.87 (m, 2H), 4.32 (d,  $J$  = 15.0 Hz, 1H), 3.90 (s, 3H), 3.72 (s, 3H), 3.55 (d,  $J$  = 10.0 Hz, 3H), 3.44 (d,  $J$  = 10.0 Hz, 3H).

**$^{13}\text{C}$  NMR (125 MHz) in DMSO- $d_6$  ( $\delta$  in ppm):** 169.2, 169.2, 159.1 (d), 157.5, 154.4, 135.7 (d), 134.4, 129.4, 129.2 (d), 122.2, 116.8, 112.6, 112.2 (d), 109.9, 108.1, 66.7, 65.4, 55.6, 52.9 (d), 52.4.

*From the article (Chem Biol Drug Des, 2013, 81, 238-249):*

**$^1\text{H}$  NMR (500 MHz) in DMSO- $d_6$  ( $\delta$  in ppm):** 10.47 (s, 1H), 7.91 (s, 1H), 7.66-7.64 (m, 1H), 7.63-7.60 (m, 1H), 7.25-7.23 (m, 2H), 6.97-6.95 (m, 1H), 6.90-6.88 (m, 1H), 5.35 (dd,  $J$  = 20.0, 20.0 Hz, 1H), 3.91 (s, 3H), 3.58 (s, 3H), 3.56-3.46 (m, 6H).

**$^{13}\text{C}$  NMR (125 MHz) in DMSO- $d_6$  ( $\delta$  in ppm):** 169.5, 166.2, 158.7 (d,  $J_{\text{CP}}$  = 20 Hz), 157.8, 155.9, 148.9 (d,  $J_{\text{CP}}$  = 36.2 Hz), 148.0 (d,  $J_{\text{CP}}$  = 20.0 Hz), 135.8 (d,  $J_{\text{CP}}$  = 36.2 Hz), 131.8 (d,  $J_{\text{CP}}$  = 11.2 Hz), 128.5, 118.0 (d,  $J_{\text{CP}}$  = 10.0 Hz), 116.3, 112.0 (d,  $J_{\text{CP}}$  = 22.5 Hz), 111.7, 107.0 (d,  $J_{\text{CP}}$  = 26.2 Hz), 56.4, 55.3, 52.2.

**(2) Crystal data and structure refinement for CHUL08 (2)**

## checkCIF/PLATON report

Structure factors have been supplied for datablock(s) chul08

THIS REPORT IS FOR GUIDANCE ONLY. IF USED AS PART OF A REVIEW PROCEDURE FOR PUBLICATION, IT SHOULD NOT REPLACE THE EXPERTISE OF AN EXPERIENCED CRYSTALLOGRAPHIC REFEREE.

No syntax errors found.      CIF dictionary      Interpreting this report

### Datablock: chul08

---

|                        |                               |                                    |
|------------------------|-------------------------------|------------------------------------|
| Bond precision:        | C-C = 0.0042 Å                | Wavelength=1.34139                 |
| Cell:                  | a=11.7243 (6)<br>alpha=90     | b=24.6420 (12)<br>beta=106.034 (2) |
|                        |                               | c=7.8468 (4)<br>gamma=90           |
| Temperature:           | 150 K                         |                                    |
|                        | Calculated                    | Reported                           |
| Volume                 | 2178.83 (19)                  | 2178.83 (19)                       |
| Space group            | P 21/c                        | P 1 21/c 1                         |
| Hall group             | -P 2ybc                       | -P 2ybc                            |
| Moiety formula         | 2 (C19 H21 N2 O7 P S), C H4 O | C19 H21 N2 O7 P S, 0.5 (C H4 O)    |
| Sum formula Mr         | C39 H46 N4 O15 P2 S2          | C19.50 H23 N2 O7.50 P S            |
| Dx, g cm <sup>-3</sup> | 1.428                         | 1.428                              |
| Z                      | 2                             | 4                                  |
| Mu (mm <sup>-1</sup> ) | 1.588                         | 1.576                              |
| 1) F000                | 980.0                         | 980.0                              |
| F000'                  | 984.49                        |                                    |
| h,k,lmax               | 15,31,10                      | 15,31,10                           |
| Nref                   | 4941                          | 4900                               |
| Tmin,Tmax              | 0.893,0.95                    | 0.639,0.752                        |
| Tmin'                  | 0.789                         |                                    |

Correction method= # Reported T Limits: Tmin=0.639 Tmax=0.752

AbsCorr = MULTI-SCAN

Data completeness= 0.992      Theta(max)= 60.176

R(reflections)= 0.0599 ( 3862)      wR2(reflections)= 0.1718 ( 4900)

S = 1.065      Npar= 316

---

The following ALERTS were generated. Each ALERT has the format

**test-name\_ALERT\_alert-type\_alert-level.**

Click on the hyperlinks for more details of the test.

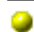

### Alert level C

|                   |                                                 |              |
|-------------------|-------------------------------------------------|--------------|
| PLAT340_ALERT_3_C | Low Bond Precision on C-C Bonds .....           | 0.00421 Ang. |
| PLAT413_ALERT_2_C | Short Inter XH3 .. XHn H19C ..H1AC              | 2.13 Ang.    |
| PLAT906_ALERT_3_C | Large K Value in the Analysis of Variance ..... | 3.610 Check  |

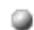

### Alert level G

|                                                                                                         |                                                  |              |
|---------------------------------------------------------------------------------------------------------|--------------------------------------------------|--------------|
| ABSMU01_ALERT_1_G Calculation of _exptl_absorpt_correction_mu<br>not performed for this radiation type. |                                                  |              |
| PLAT002_ALERT_2_G                                                                                       | Number of Distance or Angle Restraints on AtSite | 4 Note       |
| PLAT003_ALERT_2_G                                                                                       | Number of Uiso or Uij Restrained non-H Atoms ... | 4 Report     |
| PLAT007_ALERT_5_G                                                                                       | Number of Unrefined Donor-H Atoms .....          | 4 Report     |
| PLAT042_ALERT_1_G                                                                                       | Calc. and Reported MoietyFormula Strings Differ  | Please Check |
| PLAT045_ALERT_1_G                                                                                       | Calculated and Reported Z Differ by a Factor ... | 0.50 Check   |
| PLAT172_ALERT_4_G                                                                                       | The CIF-Embedded .res File Contains DFIX Records | 1 Report     |
| PLAT175_ALERT_4_G                                                                                       | The CIF-Embedded .res File Contains SAME Records | 1 Report     |
| PLAT186_ALERT_4_G                                                                                       | The CIF-Embedded .res File Contains ISOR Records | 1 Report     |
| PLAT302_ALERT_4_G                                                                                       | Anion/Solvent/Minor-Residue Disorder (Resd 2 )   | 100% Note    |
| PLAT302_ALERT_4_G                                                                                       | Anion/Solvent/Minor-Residue Disorder (Resd 3 )   | 100% Note    |
| PLAT304_ALERT_4_G                                                                                       | Non-Integer Number of Atoms in ..... Resd 2      | 1.53 Check   |
| PLAT304_ALERT_4_G                                                                                       | Non-Integer Number of Atoms in ..... Resd 3      | 1.47 Check   |
| PLAT395_ALERT_2_G                                                                                       | Deviating X-O-Y Angle From 120 for O5            | 120.4 Degree |
| PLAT395_ALERT_2_G                                                                                       | Deviating X-O-Y Angle From 120 for O6            | 122.0 Degree |
| PLAT432_ALERT_2_G                                                                                       | Short Inter X...Y Contact N2 ..C1A               | 2.95 Ang.    |
| PLAT720_ALERT_4_G                                                                                       | Number of Unusual/Non-Standard Labels .....      | 7 Note       |
| PLAT793_ALERT_4_G                                                                                       | Model has Chirality at C1 (Centro SPGR)          | R Verify     |
| PLAT860_ALERT_3_G                                                                                       | Number of Least-Squares Restraints .....         | 27 Note      |
| PLAT912_ALERT_4_G                                                                                       | Missing # of FCF Reflections Above STh/L= 0.600  | 41 Note      |
| PLAT933_ALERT_2_G                                                                                       | Number of OMIT Records in Embedded .res File ... | 1 Note       |
| PLAT978_ALERT_2_G                                                                                       | Number C-C Bonds with Positive Residual Density. | 1 Info       |

- 
- 0 **ALERT level A** = Most likely a serious problem - resolve or explain  
 0 **ALERT level B** = A potentially serious problem, consider carefully  
 3 **ALERT level C** = Check. Ensure it is not caused by an omission or oversight  
 22 **ALERT level G** = General information/check it is not something unexpected
- 3 ALERT type 1 CIF construction/syntax error, inconsistent or missing data  
 8 ALERT type 2 Indicator that the structure model may be wrong or deficient  
 3 ALERT type 3 Indicator that the structure quality may be low  
 10 ALERT type 4 Improvement, methodology, query or suggestion  
 1 ALERT type 5 Informative message, check
-

It is advisable to attempt to resolve as many as possible of the alerts in all categories. Often the minor alerts point to easily fixed oversights, errors and omissions in your CIF or refinement strategy, so attention to these fine details can be worthwhile. In order to resolve some of the more serious problems it may be necessary to carry out additional measurements or structure refinements. However, the purpose of your study may justify the reported deviations and the more serious of these should normally be commented upon in the discussion or experimental section of a paper or in the "special\_details" fields of the CIF. checkCIF was carefully designed to identify outliers and unusual parameters, but every test has its limitations and alerts that are not important in a particular case may appear. Conversely, the absence of alerts does not guarantee there are no aspects of the results needing attention. It is up to the individual to critically assess their own results and, if necessary, seek expert advice.

### **Publication of your CIF in other journals**

Please refer to *the Notes for Authors* of the relevant journal for any special instructions relating to CIF submission.

---

**PLATON version of 30/01/2018; check.def file version of 30/01/2018**

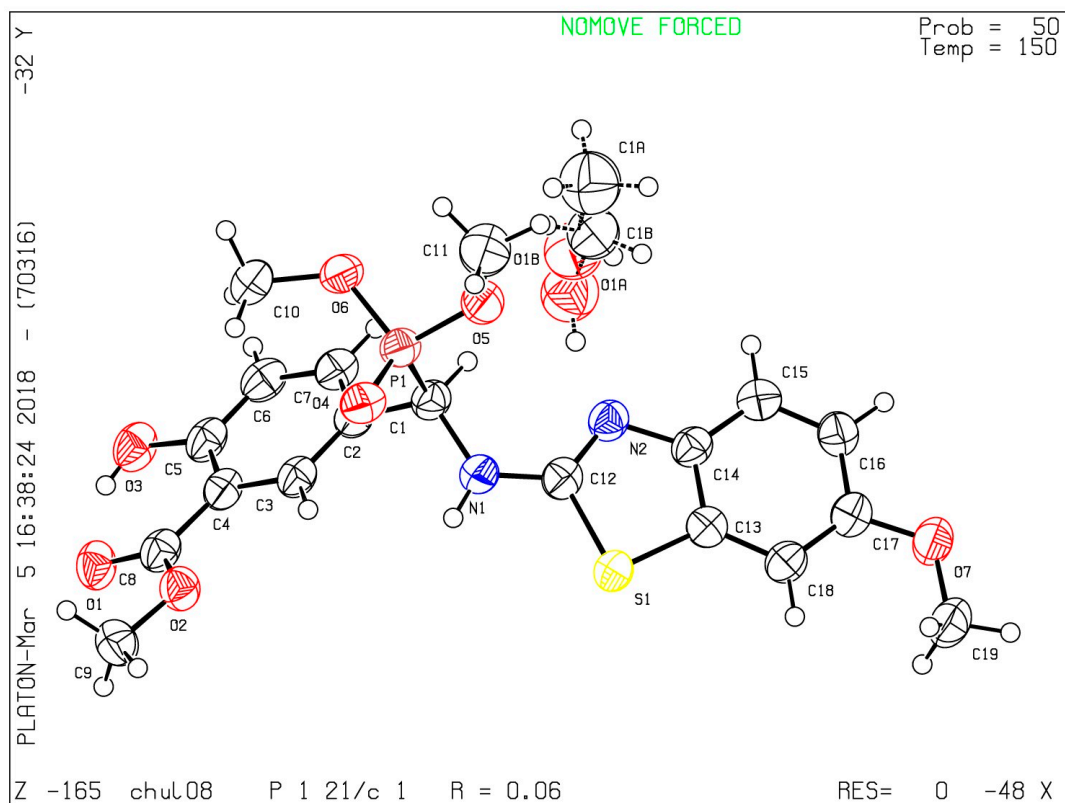

(3) NMR spectra for compound 2 in DMSO-d<sub>6</sub> (<sup>1</sup>H NMR, <sup>13</sup>C NMR (APT), COSY, HSQC and HMBC)

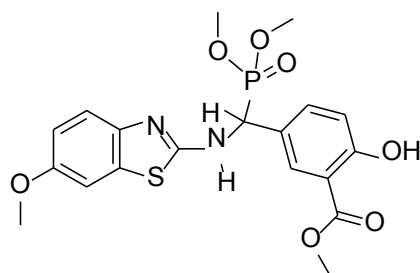

Compound 2

SB-591-38 (INH-USA)

DMSO

1e 21 mars 2018

RMN 1H 400 MHz

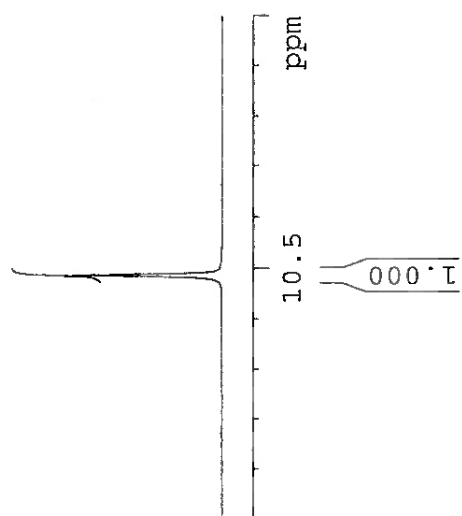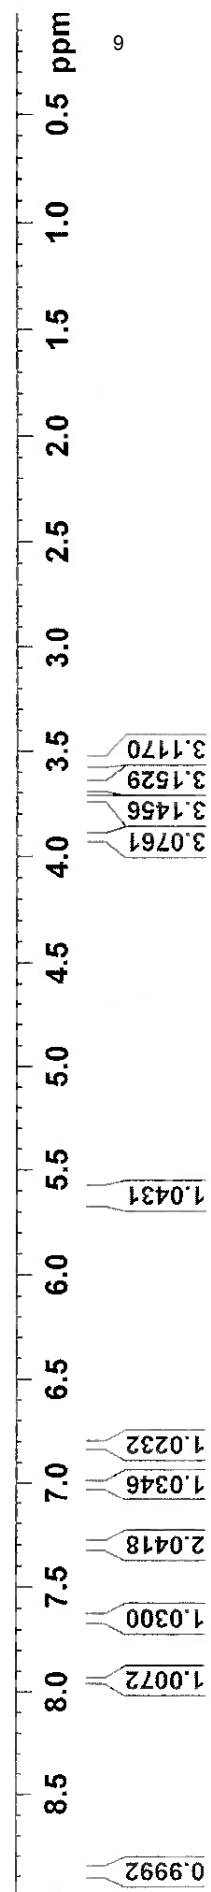



Thu Mar 22 15:26:23 EDT 2018

DU=C:\Bruker\TOPSPIN, USER=mars2018, NAME=SB-591-38-INH-US-2D, EXPNO=1, PROCNO  
F1=16.522ppm, F2=-4.167ppm, MI=0.05cm, MAXI=10000.00cm, PC=1.000

| #  | ADDRESS | FREQUENCY |         | INTENSITY | HISTOGRAM |
|----|---------|-----------|---------|-----------|-----------|
|    |         | [Hz]      | [PPM]   |           |           |
| 1  | 9515.2  | 4206.938  | 10.5139 | 0.53      | *         |
| 2  | 12083.0 | 3558.246  | 8.8927  | 0.10      |           |
| 3  | 12097.0 | 3554.709  | 8.8839  | 0.11      |           |
| 4  | 12120.6 | 3548.738  | 8.8690  | 0.11      |           |
| 5  | 12134.7 | 3545.190  | 8.8601  | 0.11      |           |
| 6  | 13575.6 | 3181.167  | 7.9503  | 0.17      |           |
| 7  | 13584.3 | 3178.978  | 7.9449  | 0.32      |           |
| 8  | 13592.8 | 3176.821  | 7.9395  | 0.18      |           |
| 9  | 14030.2 | 3066.312  | 7.6633  | 0.09      |           |
| 10 | 14037.6 | 3064.449  | 7.6586  | 0.15      |           |
| 11 | 14044.7 | 3062.654  | 7.6541  | 0.10      |           |
| 12 | 14064.4 | 3057.690  | 7.6417  | 0.10      |           |
| 13 | 14071.8 | 3055.813  | 7.6371  | 0.16      |           |
| 14 | 14078.9 | 3054.027  | 7.6326  | 0.10      |           |
| 15 | 14573.7 | 2929.026  | 7.3202  | 0.38      |           |
| 16 | 14585.0 | 2926.155  | 7.3130  | 0.46      |           |
| 17 | 14587.4 | 2925.560  | 7.3115  | 0.47      |           |
| 18 | 14623.1 | 2916.535  | 7.2890  | 0.37      |           |
| 19 | 15050.0 | 2808.697  | 7.0195  | 0.30      |           |
| 20 | 15084.0 | 2800.094  | 6.9980  | 0.29      |           |
| 21 | 15346.4 | 2733.821  | 6.8323  | 0.22      |           |
| 22 | 15356.9 | 2731.161  | 6.8257  | 0.21      |           |
| 23 | 15381.1 | 2725.040  | 6.8104  | 0.20      |           |
| 24 | 15391.6 | 2722.395  | 6.8038  | 0.20      |           |
| 25 | 17200.9 | 2265.302  | 5.6614  | 0.11      |           |
| 26 | 17238.6 | 2255.785  | 5.6376  | 0.11      |           |
| 27 | 17285.3 | 2244.000  | 5.6082  | 0.11      |           |
| 28 | 17322.9 | 2234.484  | 5.5844  | 0.11      |           |
| 29 | 19974.3 | 1564.680  | 3.9104  | 2.09      | **        |
| 30 | 20266.7 | 1490.810  | 3.7258  | 2.33      | **        |
| 31 | 20339.9 | 1472.308  | 3.6796  | 1.15      | *         |
| 32 | 20381.8 | 1461.714  | 3.6531  | 1.15      | *         |
| 33 | 20526.8 | 1425.083  | 3.5615  | 1.14      | *         |
| 34 | 20568.8 | 1414.487  | 3.5351  | 1.14      | *         |

Thu Mar 22 15:26:23 EDT 2018

|    |         |          |        |       |       |
|----|---------|----------|--------|-------|-------|
| 35 | 20837.0 | 1346.717 | 3.3657 | 0.07  |       |
| 36 | 20915.7 | 1326.840 | 3.3160 | 12.50 | ***** |
| 37 | 22194.2 | 1003.863 | 2.5088 | 0.20  |       |
| 38 | 22201.0 | 1002.147 | 2.5046 | 0.42  |       |
| 39 | 22208.1 | 1000.357 | 2.5001 | 0.59  | *     |
| 40 | 22215.1 | 998.579  | 2.4956 | 0.44  |       |
| 41 | 22221.9 | 996.873  | 2.4914 | 0.21  |       |

SB-591-38 (INH-USA)

DMSO

1e 21 mars 2018

RMN 1H 400 MHz

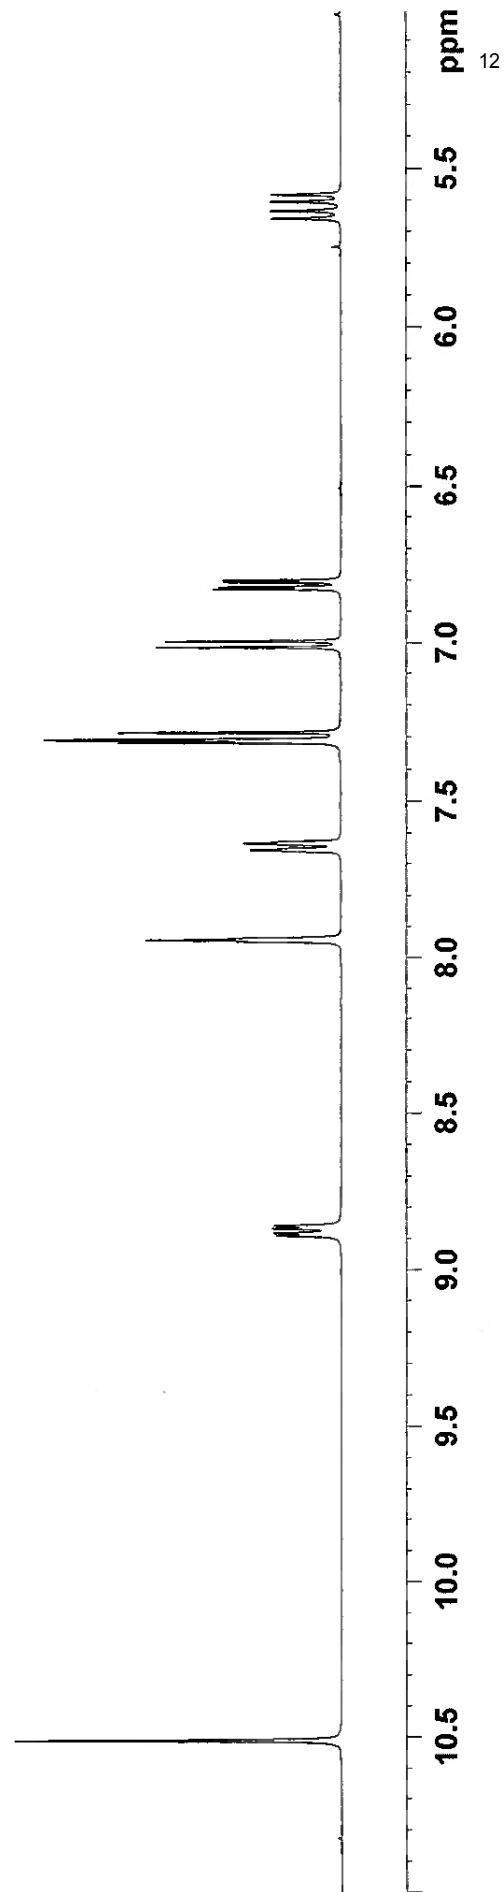

SB-591-38 (INH-USA)

DMSO

le 21 mars 2018

RMN 1H 400 MHz

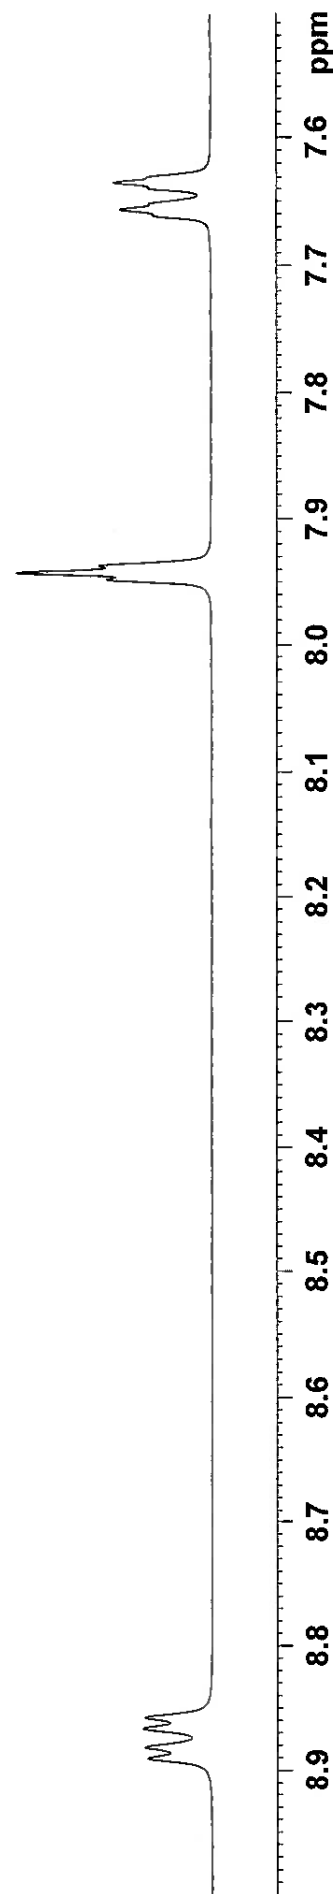

SB-591-38 (INH-USA)

DMSO

1e 21 mars 2018

RMN 1H 400 MHz

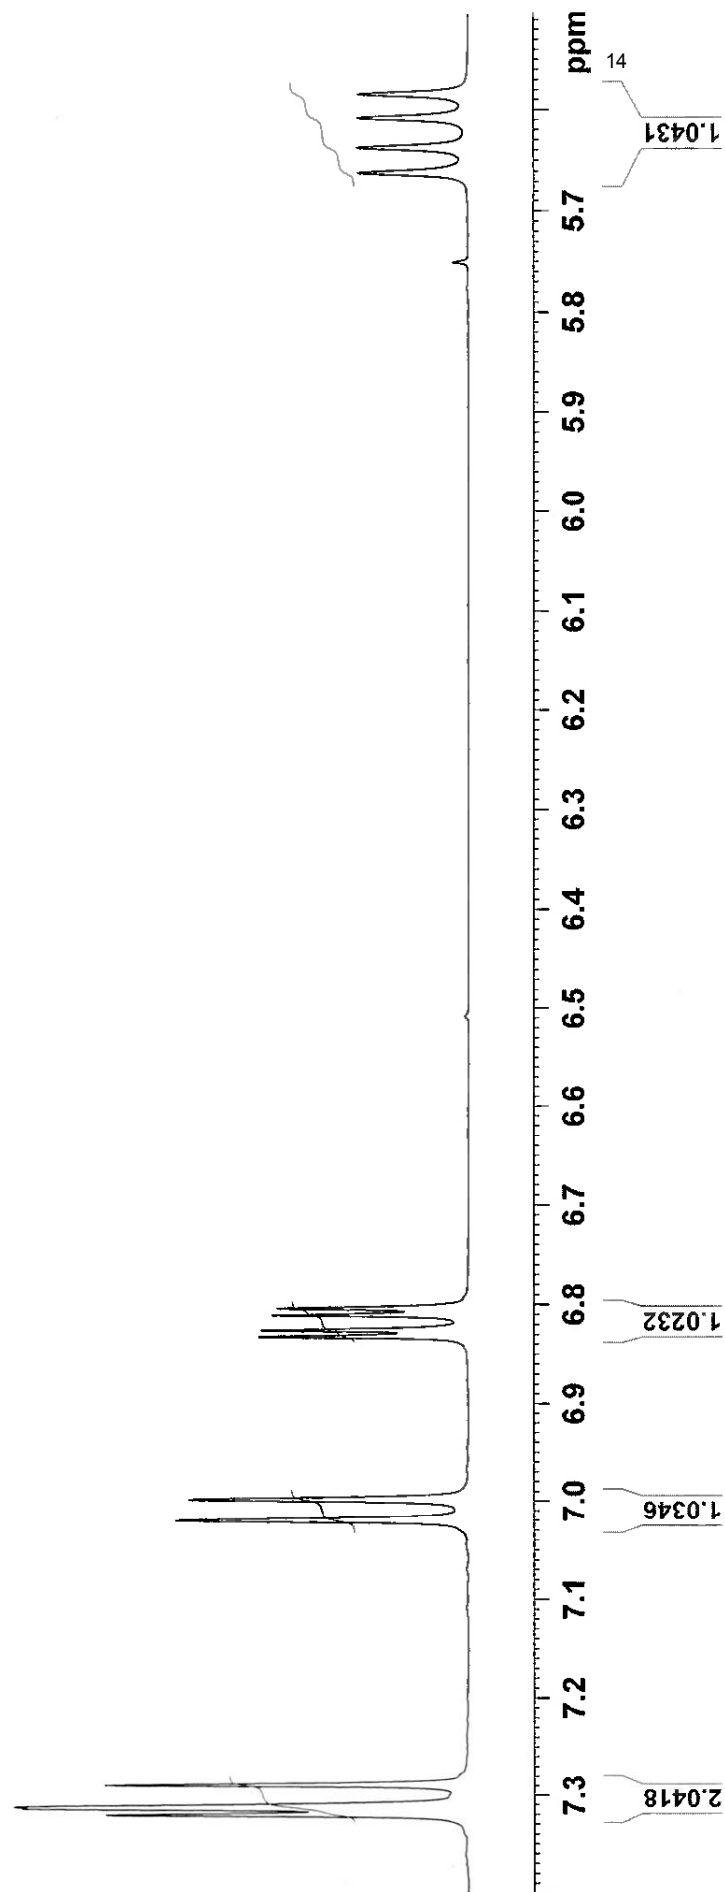

SB-591-38-INH-US  
Dans le DMSO  
22 mars 2018  
APT

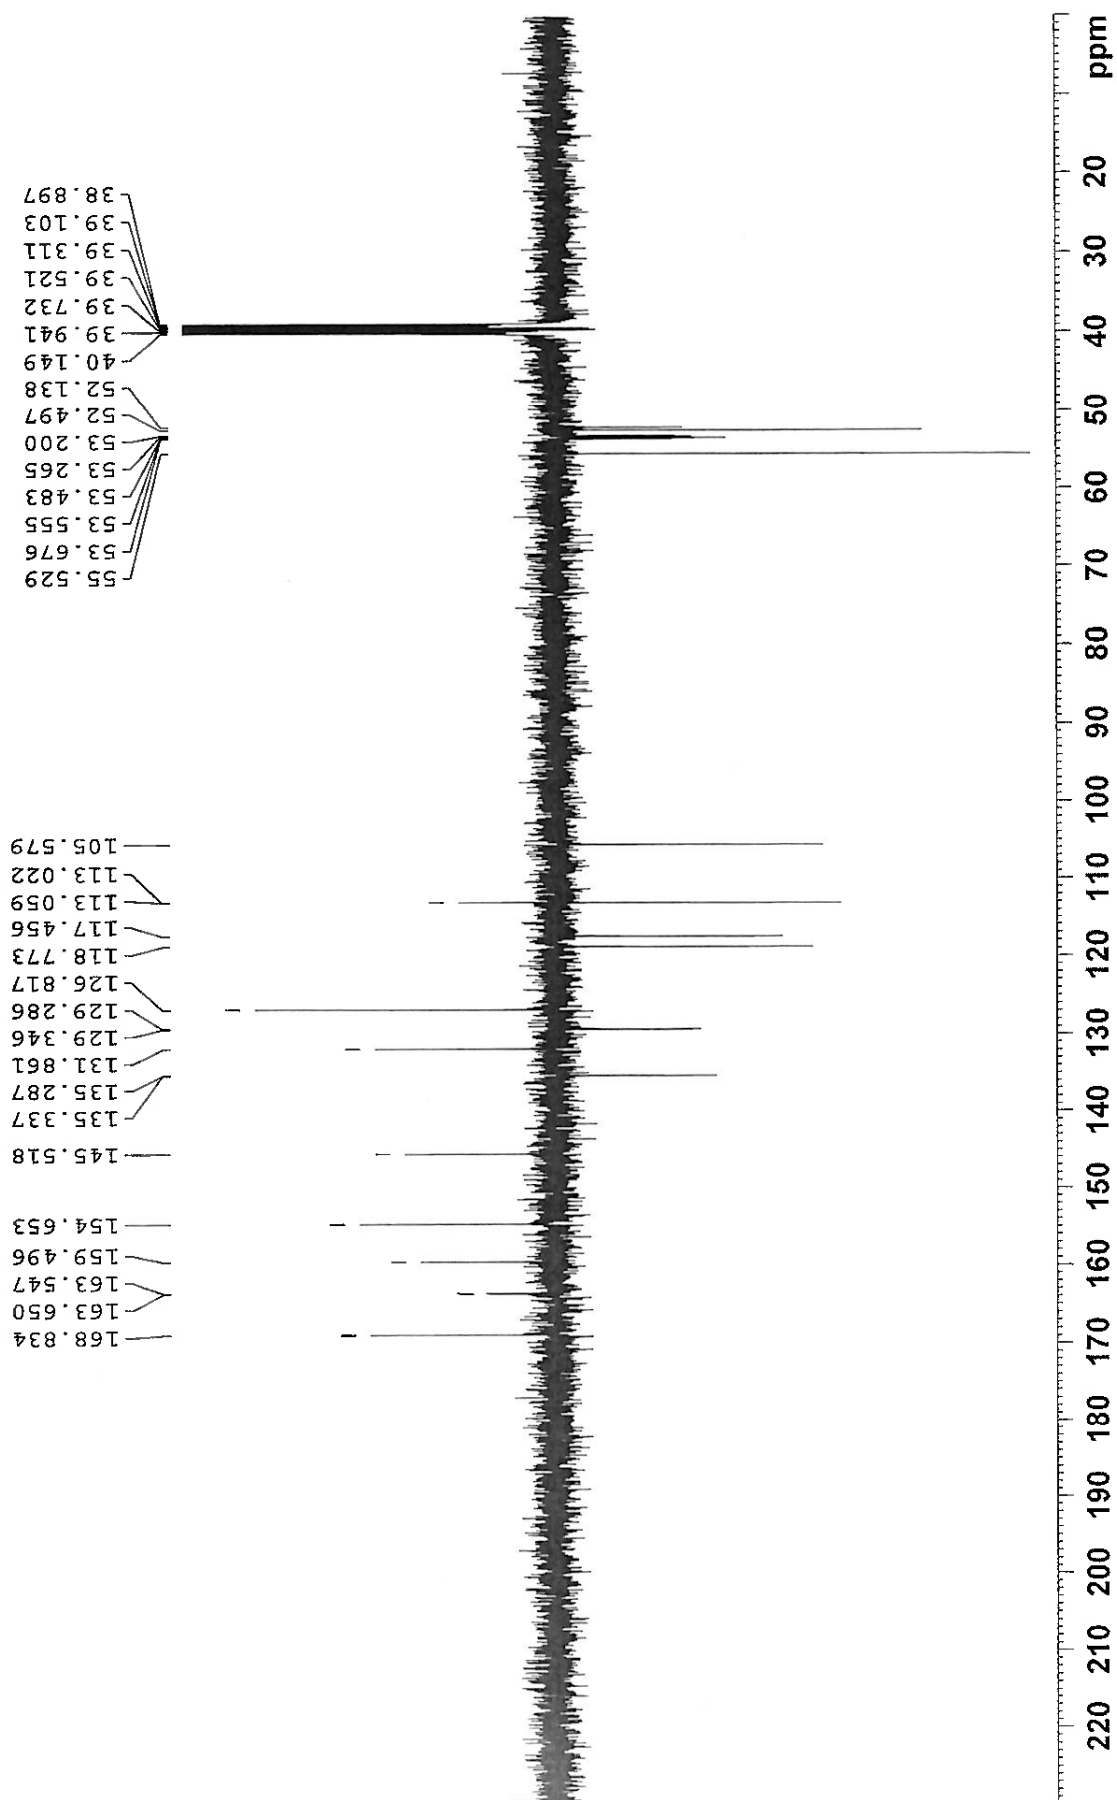

Fri Mar 23 09:34:54 EDT 2018

DU=C:\Bruker\TOPSPIN, USER=mars2018, NAME=SB-591-38-US-2D, EXPNO=4, PROCNO=1  
F1=249.209ppm, F2=-50.161ppm, MI=0.00cm, MAXI=10000.00cm, PC=1.400

| #  | ADDRESS | FREQUENCY |          | INTENSITY | HISTOGRAM |
|----|---------|-----------|----------|-----------|-----------|
|    |         | [Hz]      | [PPM]    |           |           |
| 1  | 8797.1  | 16986.861 | 168.8340 | 0.39      |           |
| 2  | 9364.4  | 16465.342 | 163.6505 | 0.15      |           |
| 3  | 9375.8  | 16454.885 | 163.5466 | 0.15      |           |
| 4  | 9819.2  | 16047.345 | 159.4960 | 0.29      |           |
| 5  | 10349.2 | 15560.099 | 154.6532 | 0.42      |           |
| 6  | 11349.2 | 14640.929 | 145.5175 | 0.32      |           |
| 7  | 12463.5 | 13616.615 | 135.3368 | -0.30     |           |
| 8  | 12469.0 | 13611.583 | 135.2868 | -0.34     |           |
| 9  | 12844.0 | 13266.922 | 131.8612 | 0.38      |           |
| 10 | 13119.3 | 13013.844 | 129.3458 | -0.30     |           |
| 11 | 13125.8 | 13007.837 | 129.2861 | -0.31     |           |
| 12 | 13396.1 | 12759.437 | 126.8172 | 0.63      | *         |
| 13 | 14276.6 | 11950.070 | 118.7728 | -0.56     |           |
| 14 | 14420.7 | 11817.561 | 117.4558 | -0.49     |           |
| 15 | 14902.0 | 11375.158 | 113.0587 | -0.60     |           |
| 16 | 14906.0 | 11371.505 | 113.0224 | 0.20      |           |
| 17 | 15720.7 | 10622.630 | 105.5793 | -0.58     |           |
| 18 | 21199.0 | 5586.979  | 55.5295  | -1.00     |           |
| 19 | 21401.8 | 5400.509  | 53.6761  | -0.25     |           |
| 20 | 21415.1 | 5388.306  | 53.5549  | -0.30     |           |
| 21 | 21423.0 | 5381.067  | 53.4829  | -0.36     |           |
| 22 | 21446.9 | 5359.116  | 53.2647  | -0.30     |           |
| 23 | 21454.0 | 5352.577  | 53.1998  | -0.26     |           |
| 24 | 21530.9 | 5281.874  | 52.4970  | -0.78     |           |
| 25 | 21570.2 | 5245.745  | 52.1379  | -0.28     |           |
| 26 | 22882.5 | 4039.471  | 40.1487  | 1.19      | *         |
| 27 | 22905.2 | 4018.584  | 39.9411  | 3.57      | ****      |
| 28 | 22928.2 | 3997.503  | 39.7316  | 6.43      | *****     |
| 29 | 22951.2 | 3976.299  | 39.5208  | 6.50      | *****     |
| 30 | 22974.2 | 3955.153  | 39.3106  | 5.53      | *****     |
| 31 | 22997.0 | 3934.218  | 39.1026  | 3.09      | ***       |
| 32 | 23019.5 | 3913.572  | 38.8974  | 1.14      | *         |

(1/1)

(wdd) f1

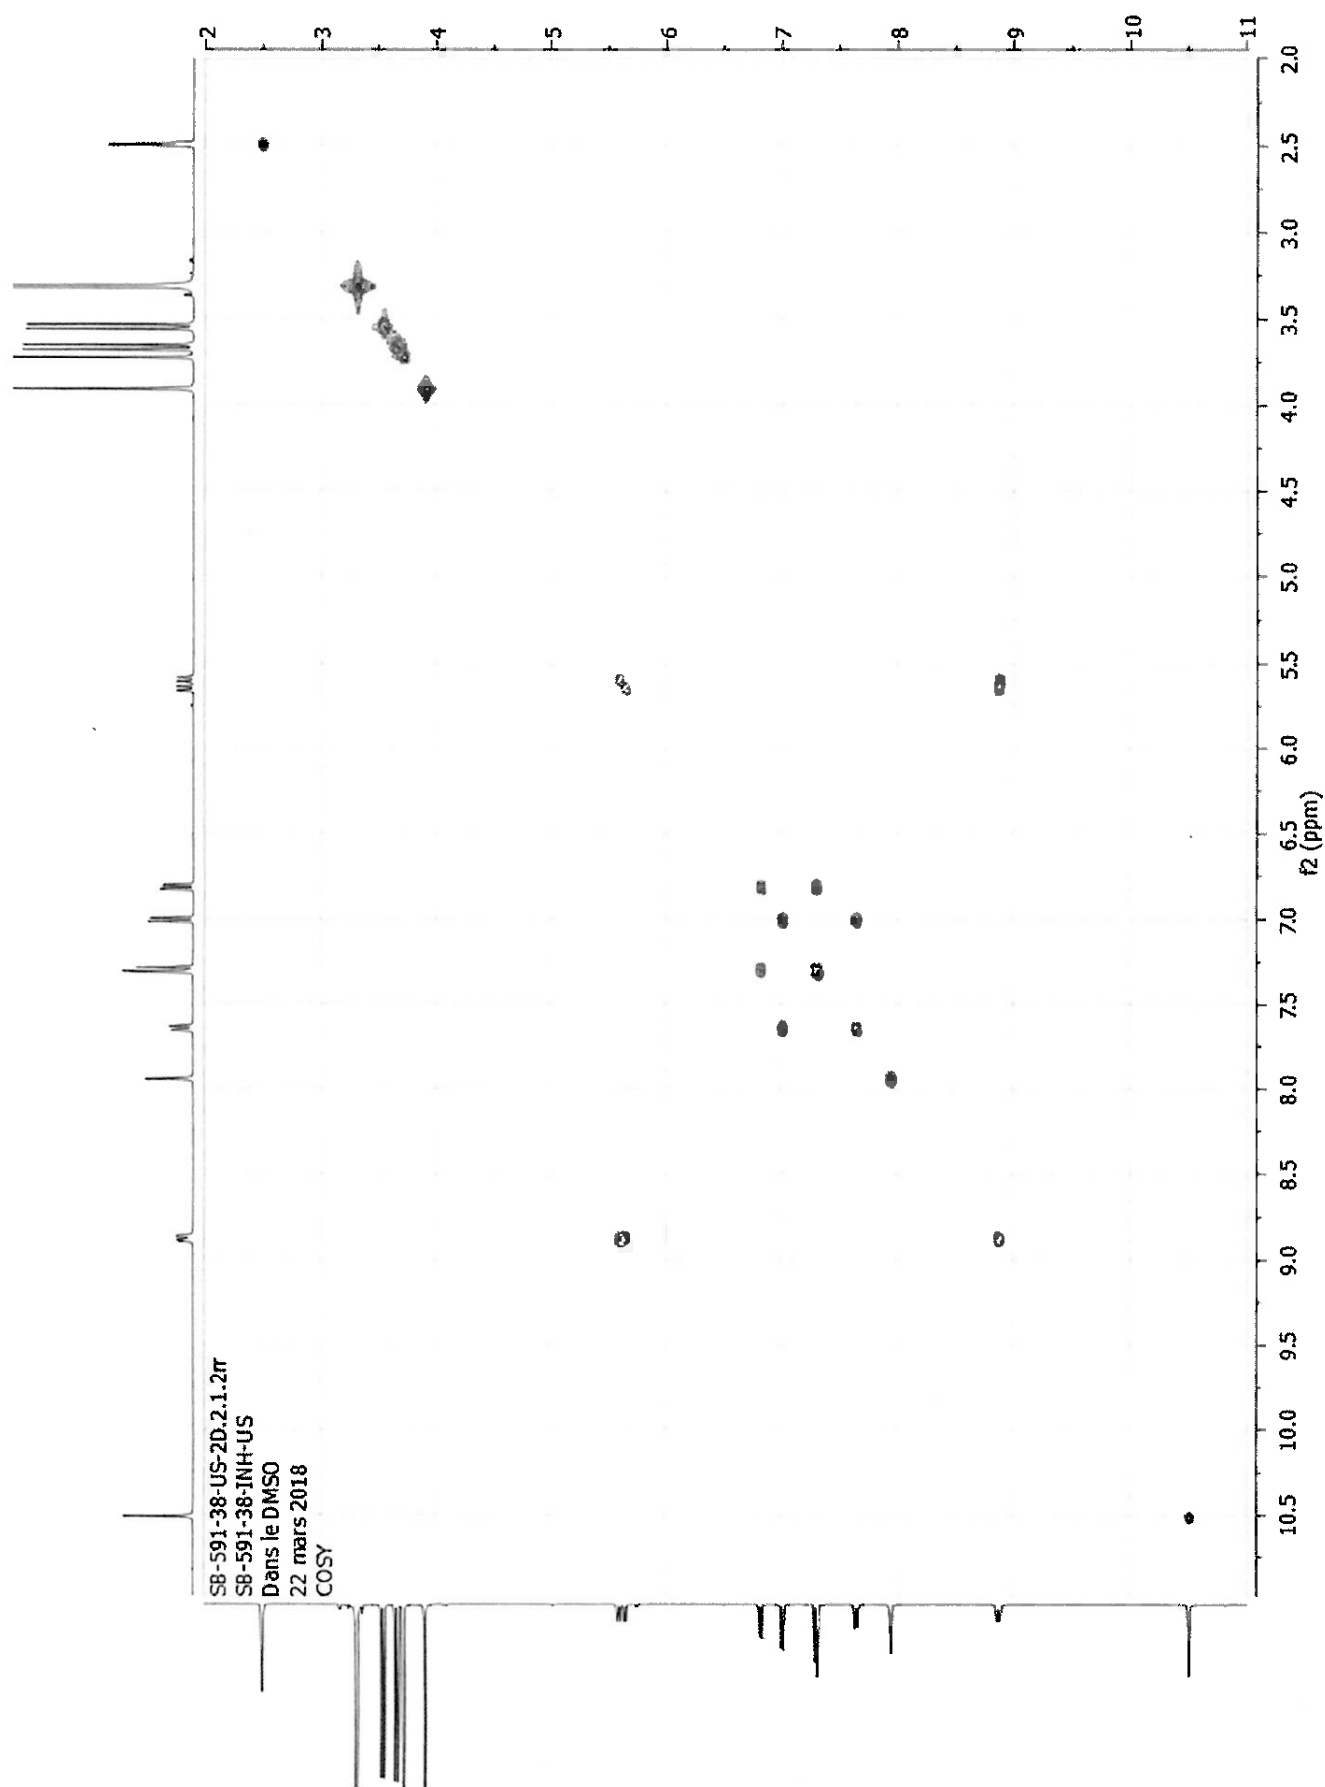



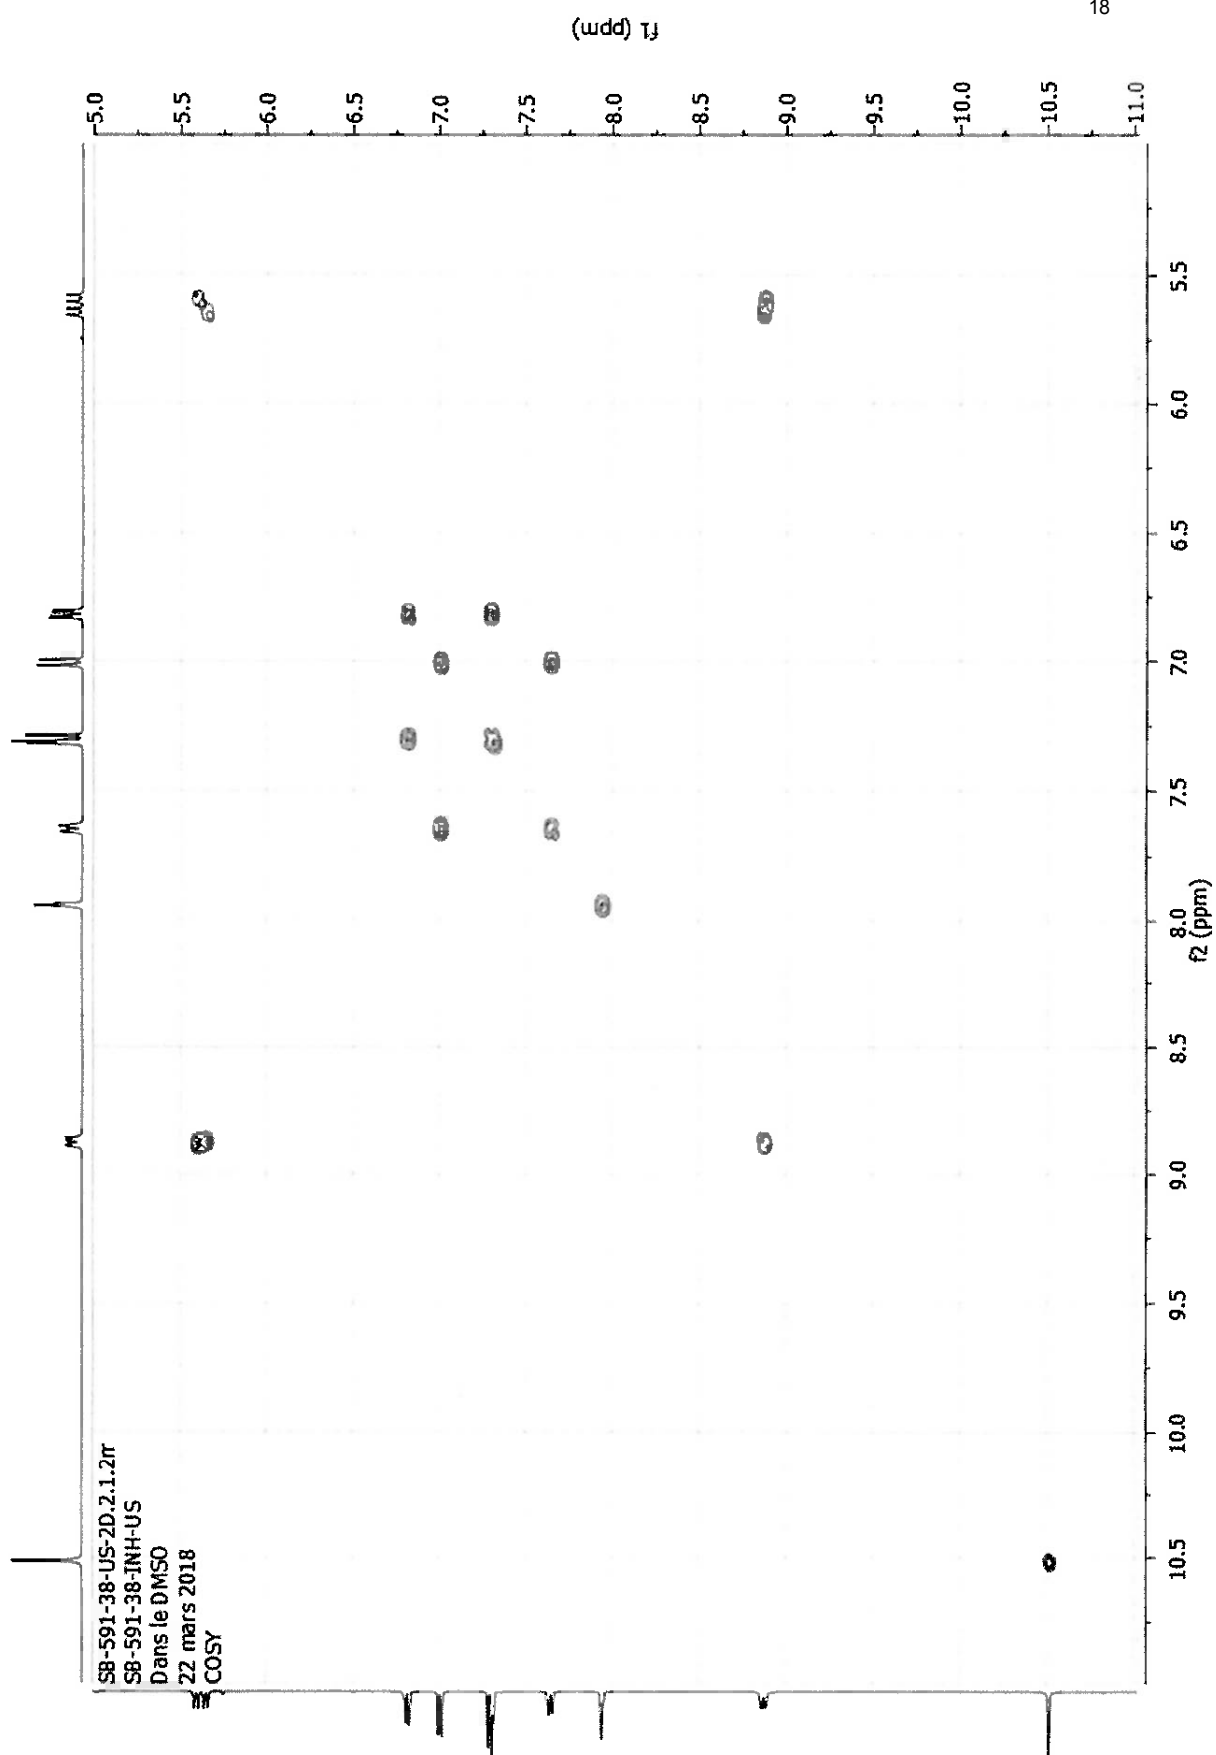

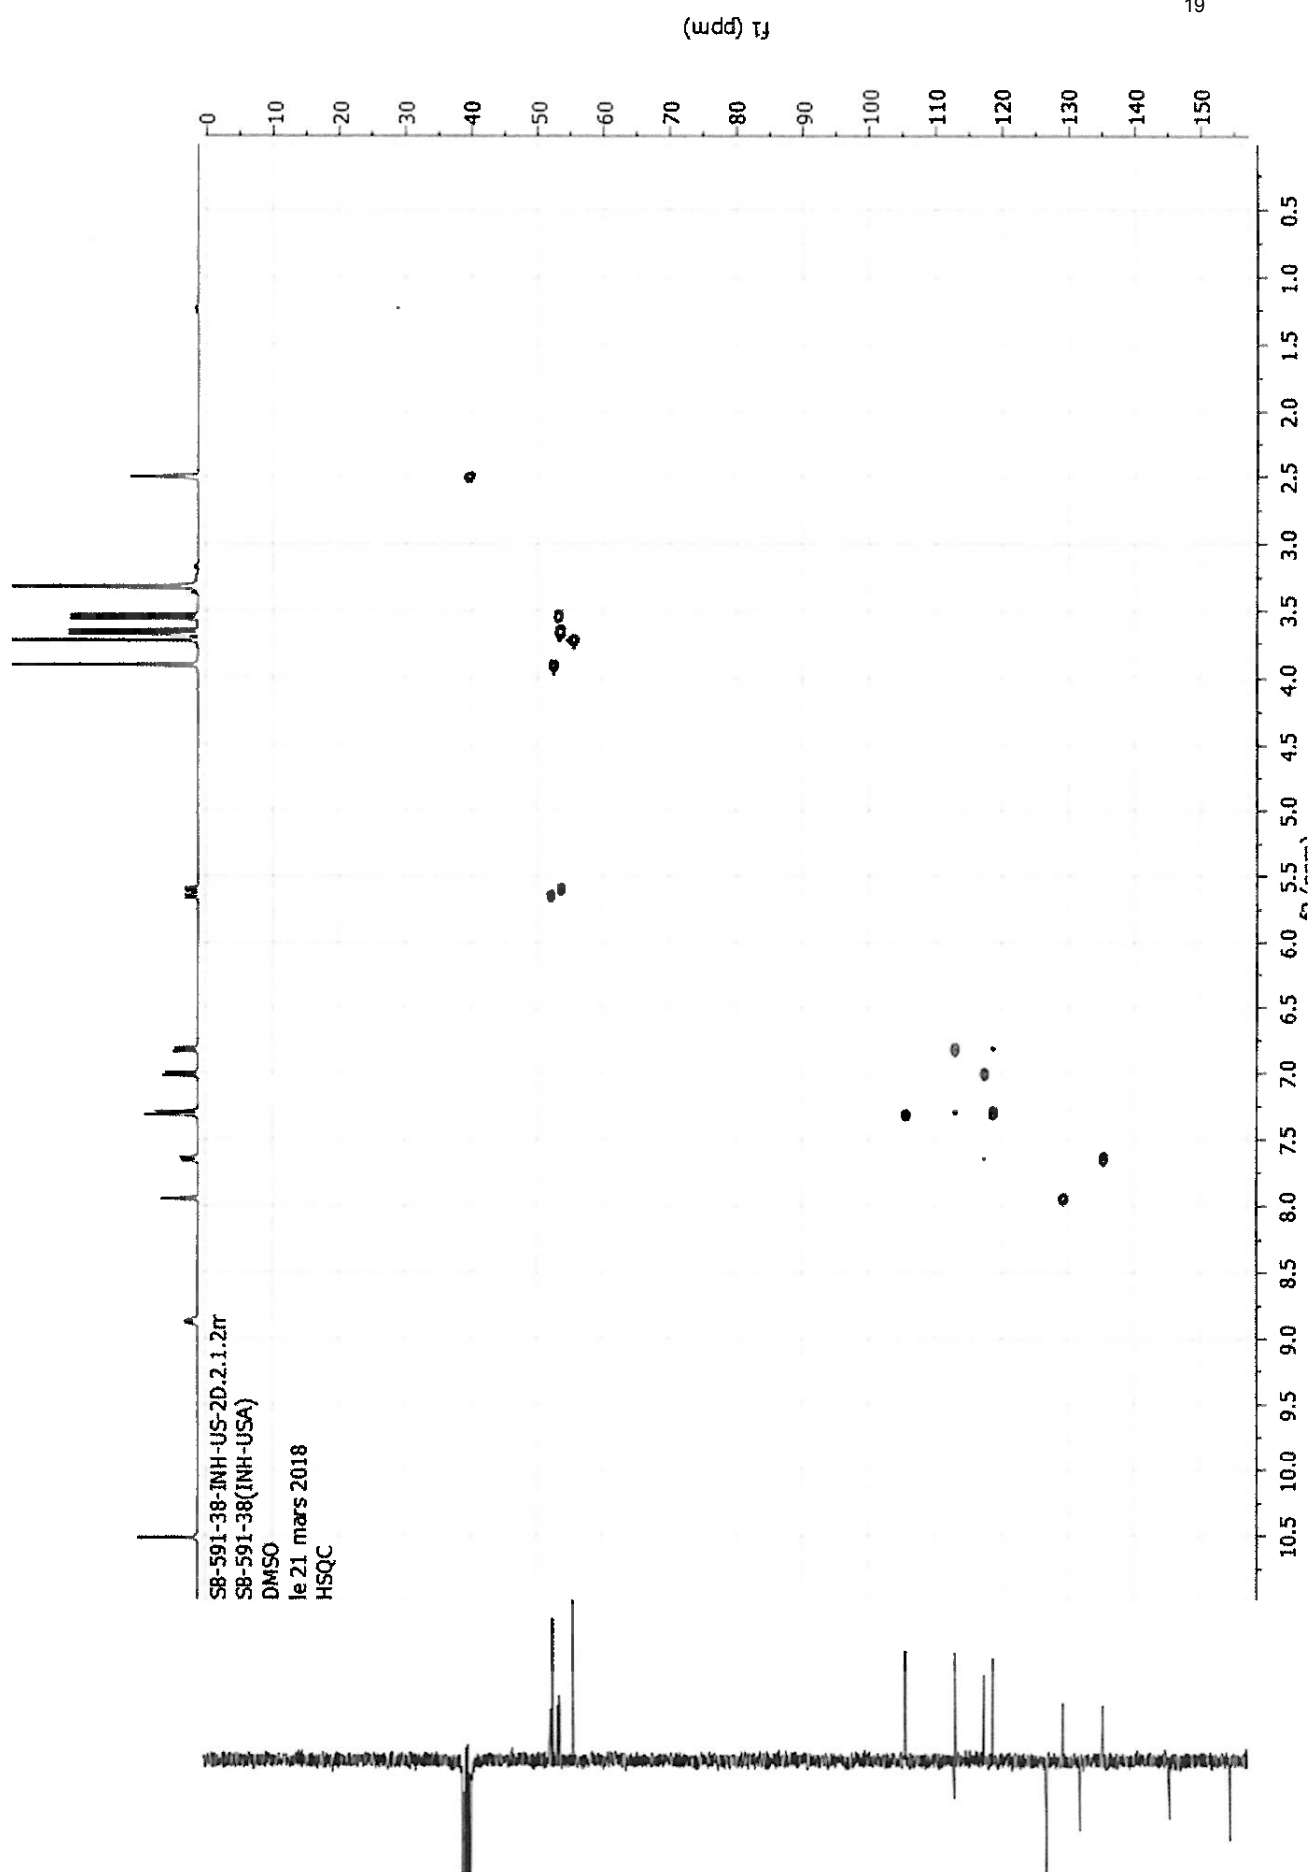

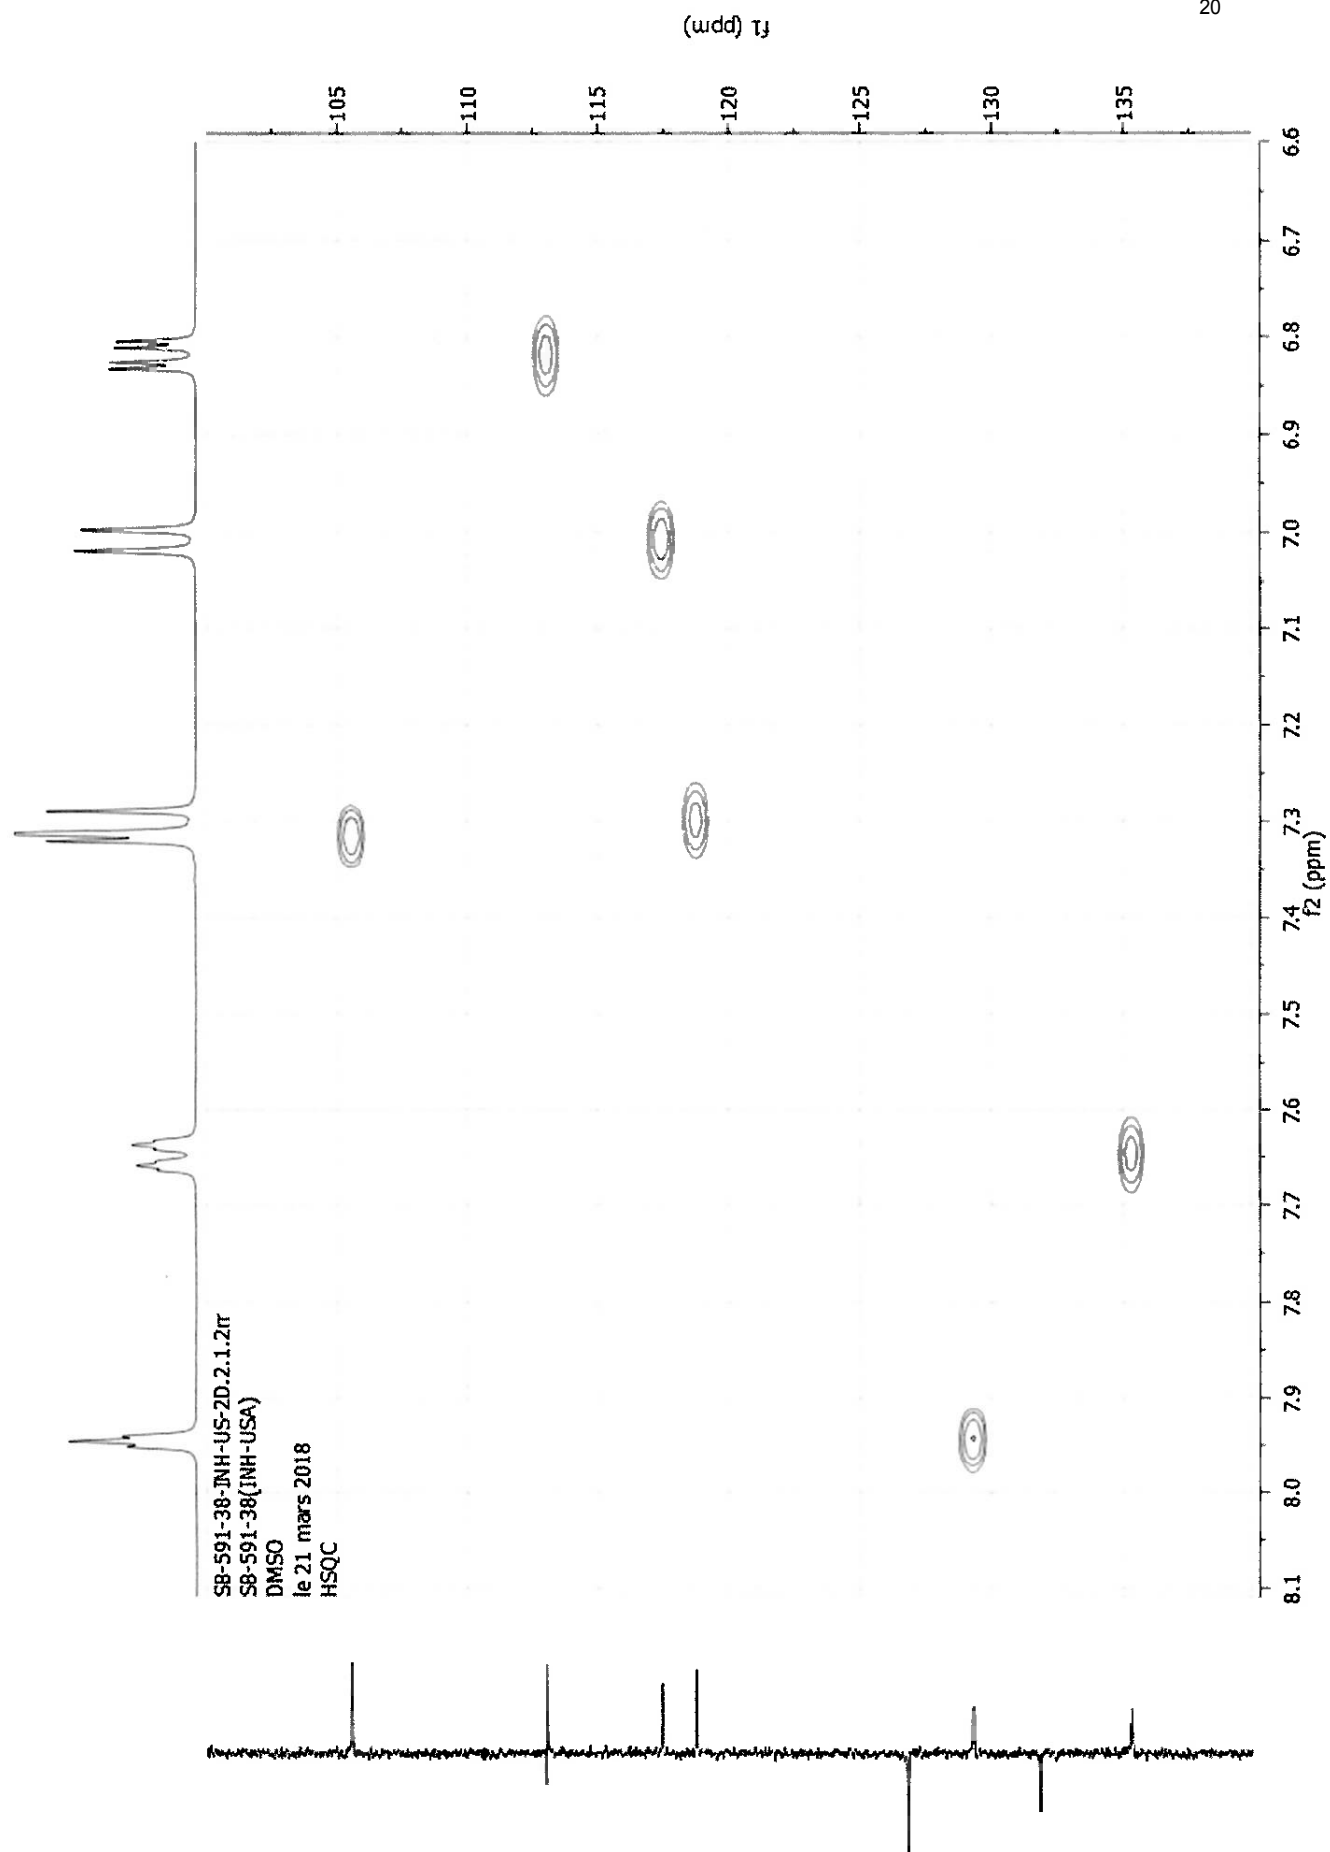

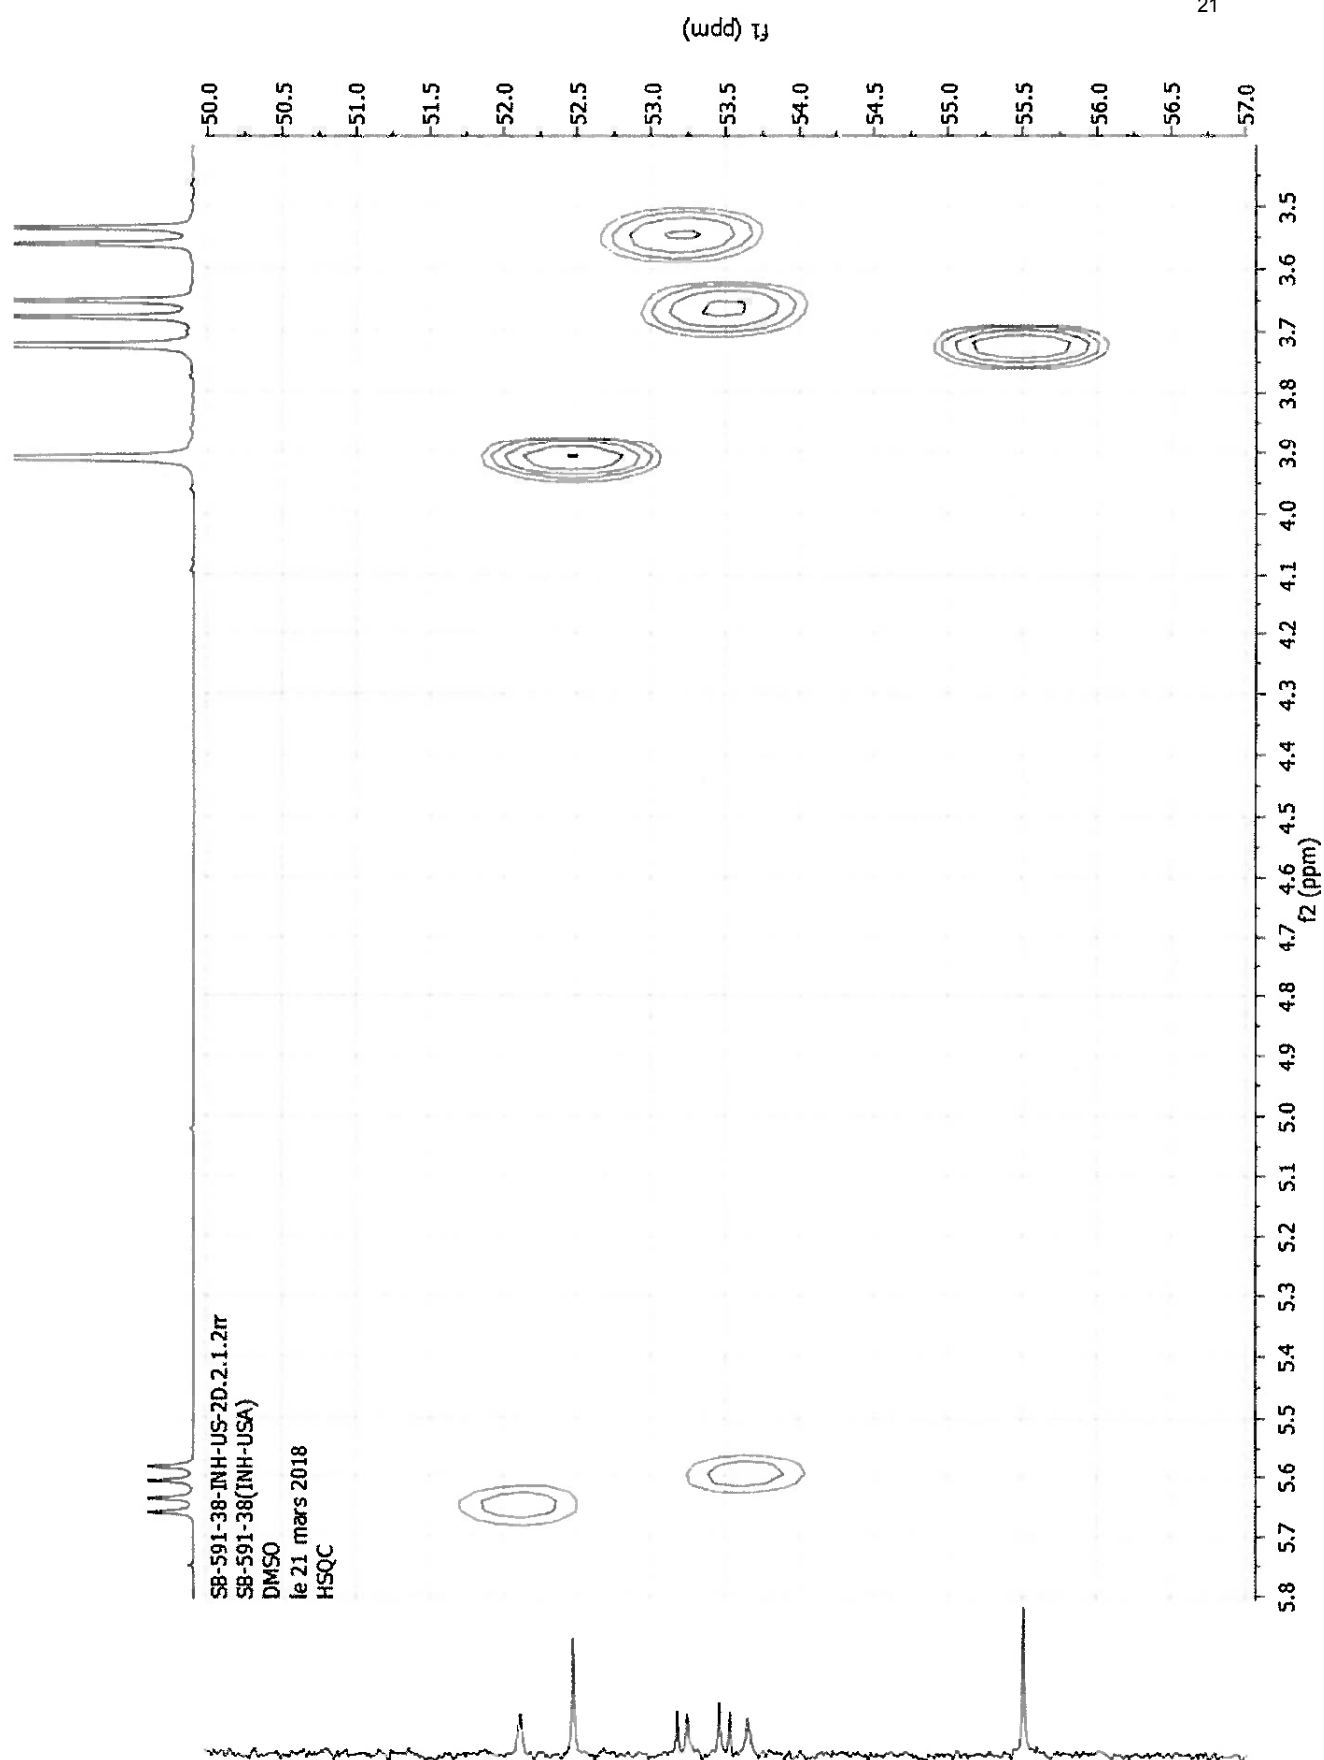

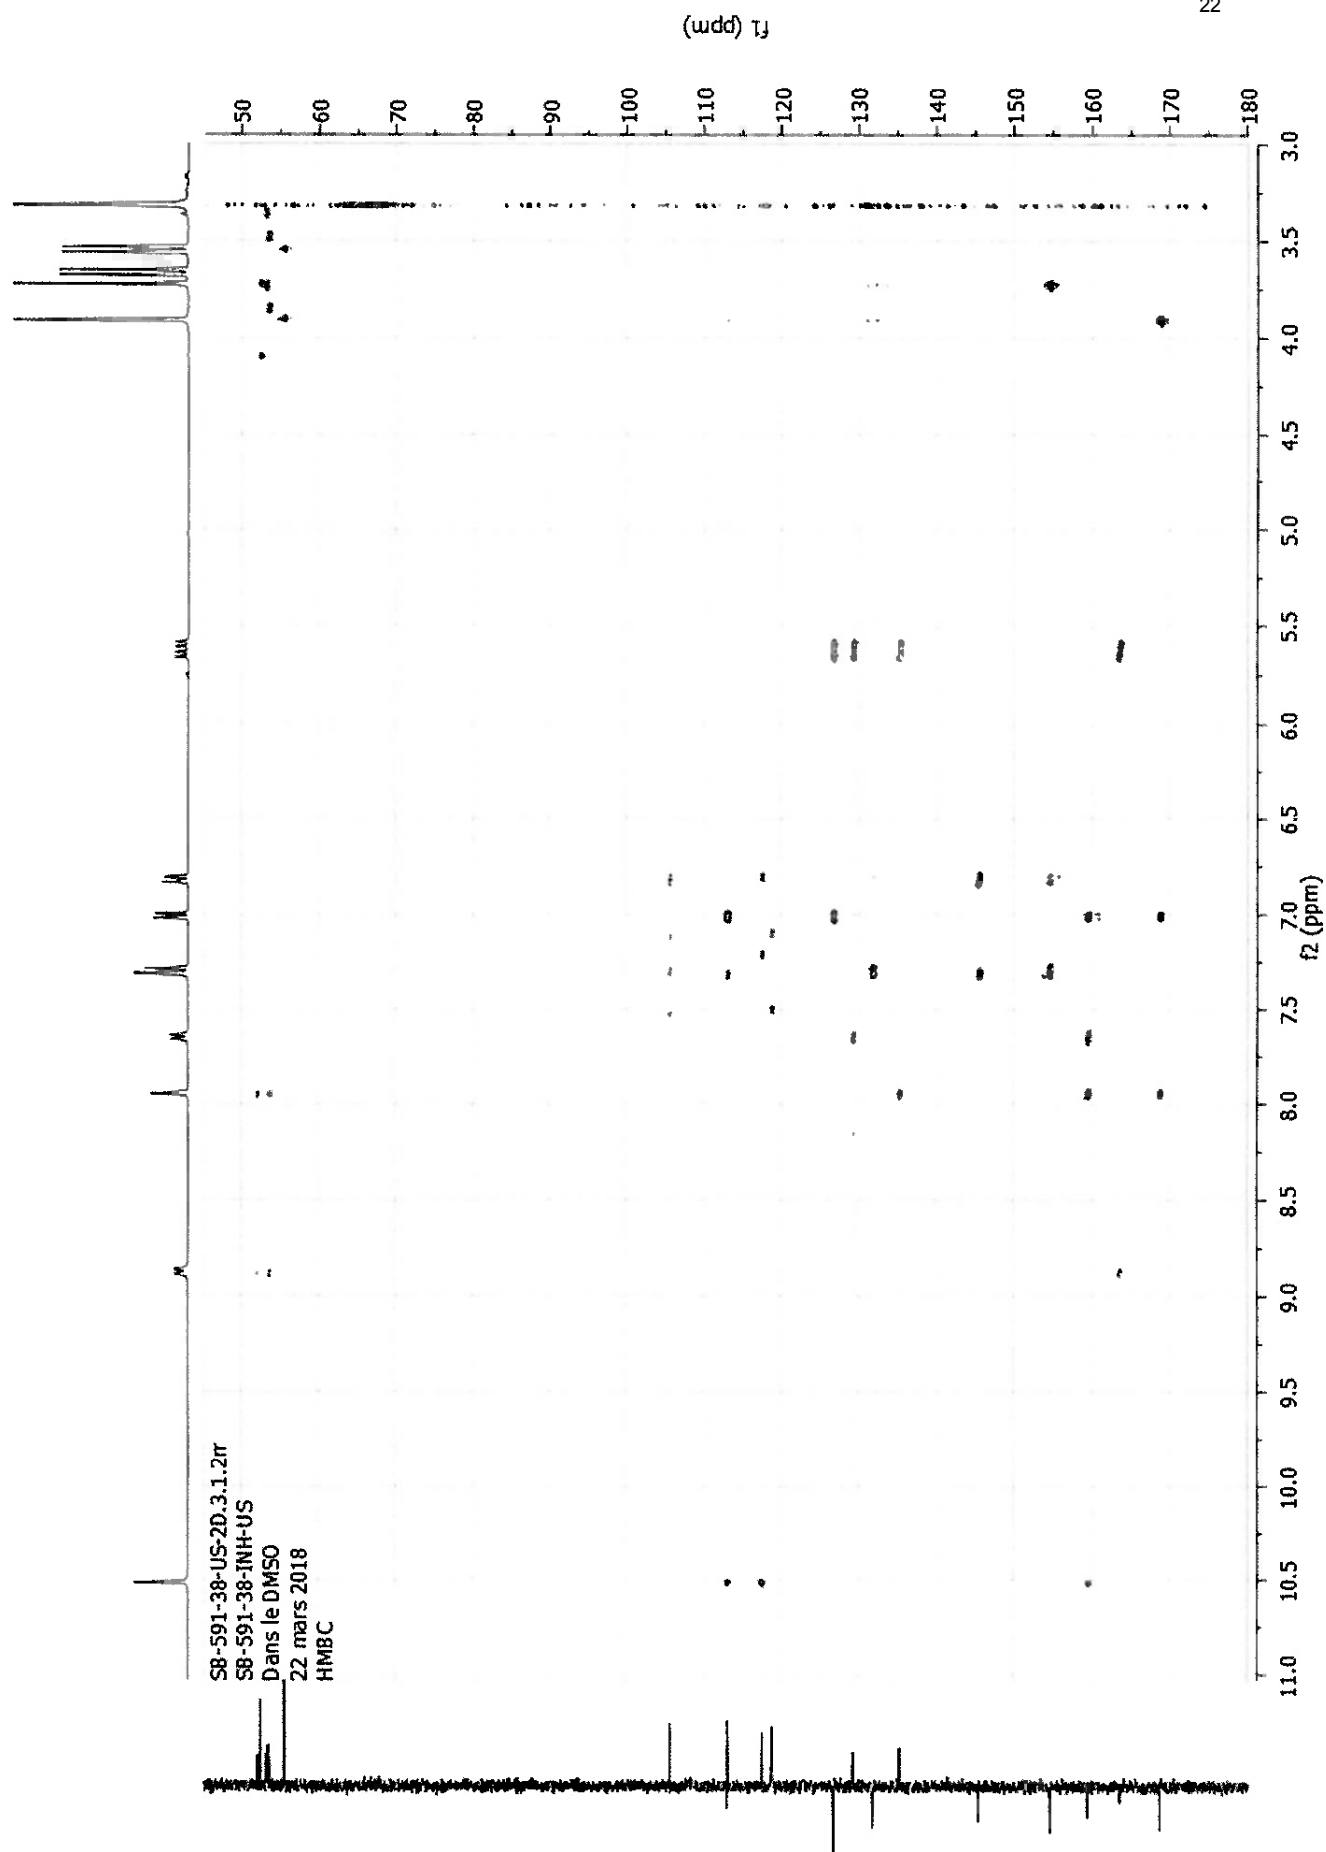

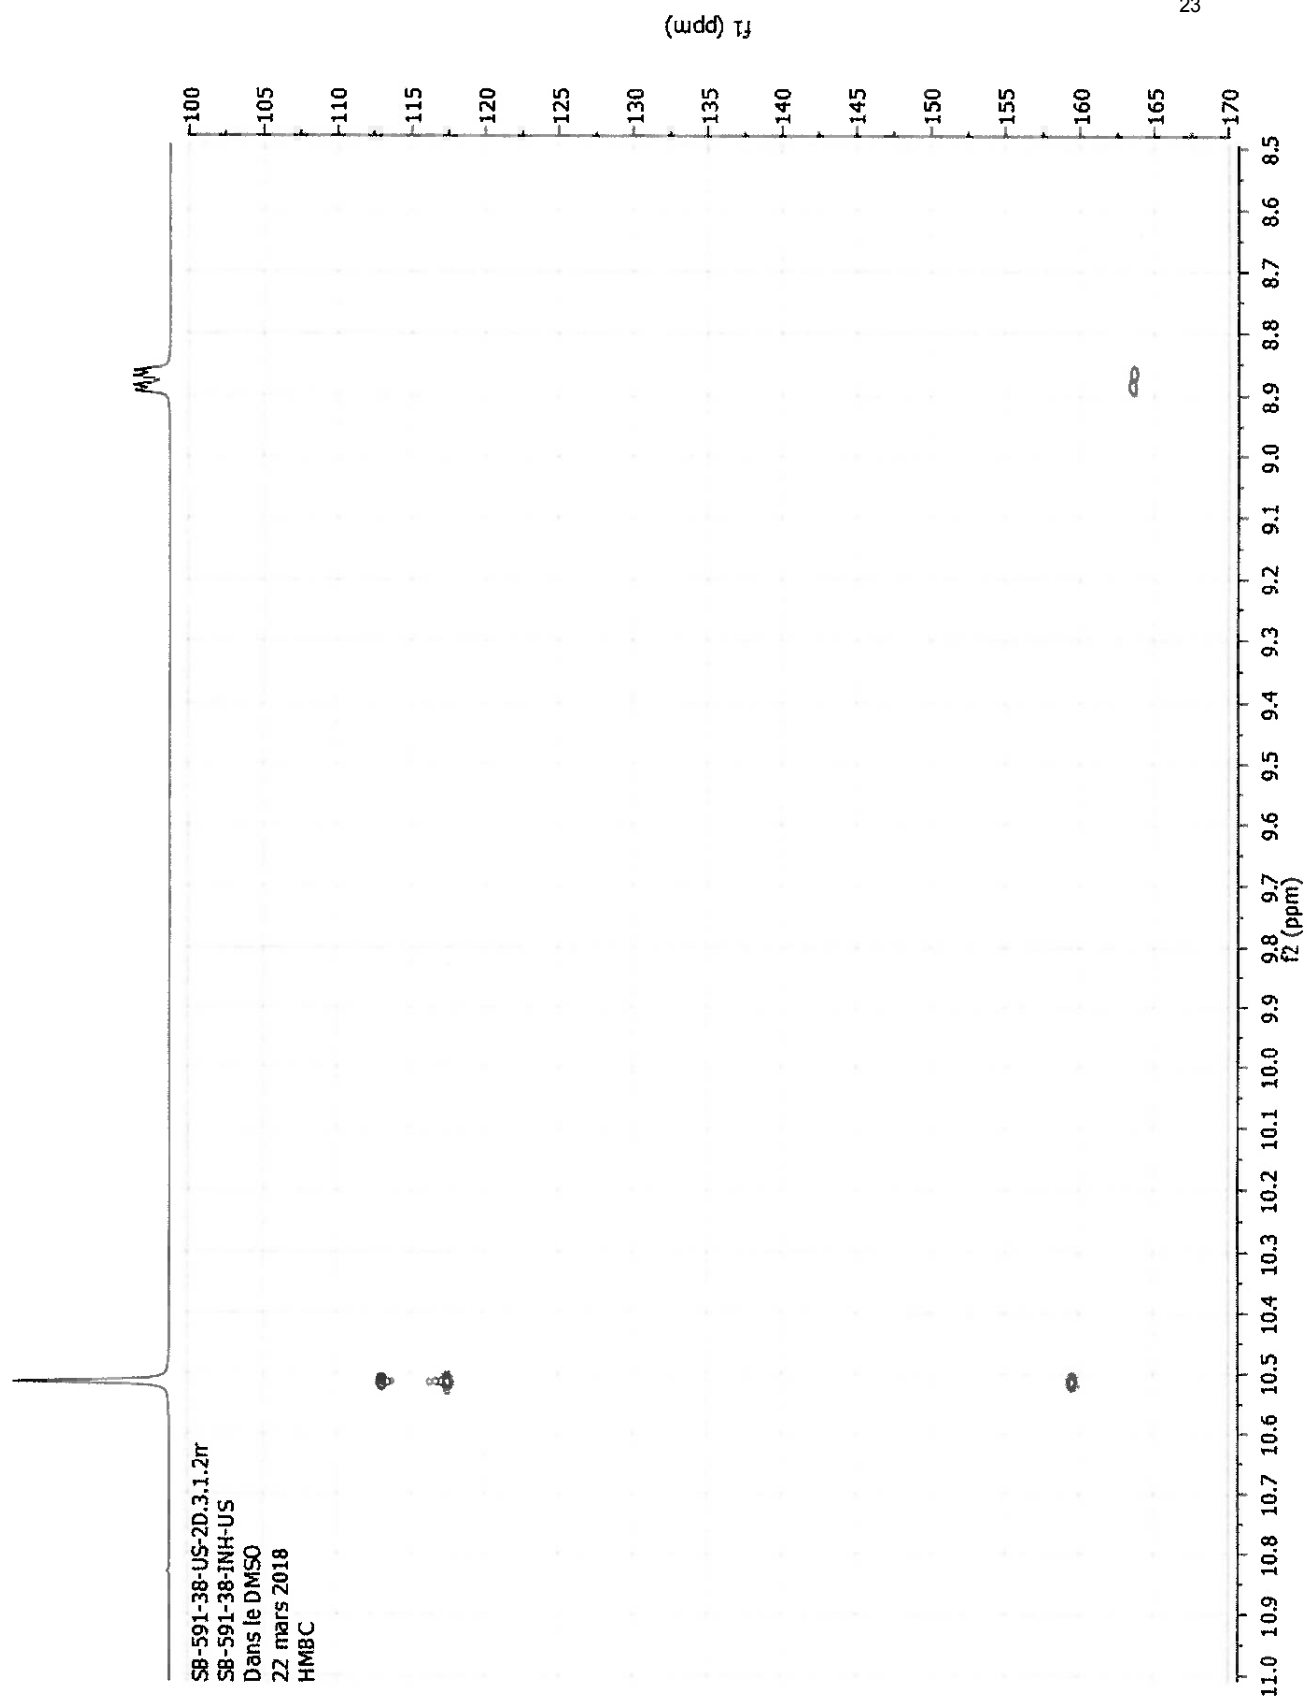

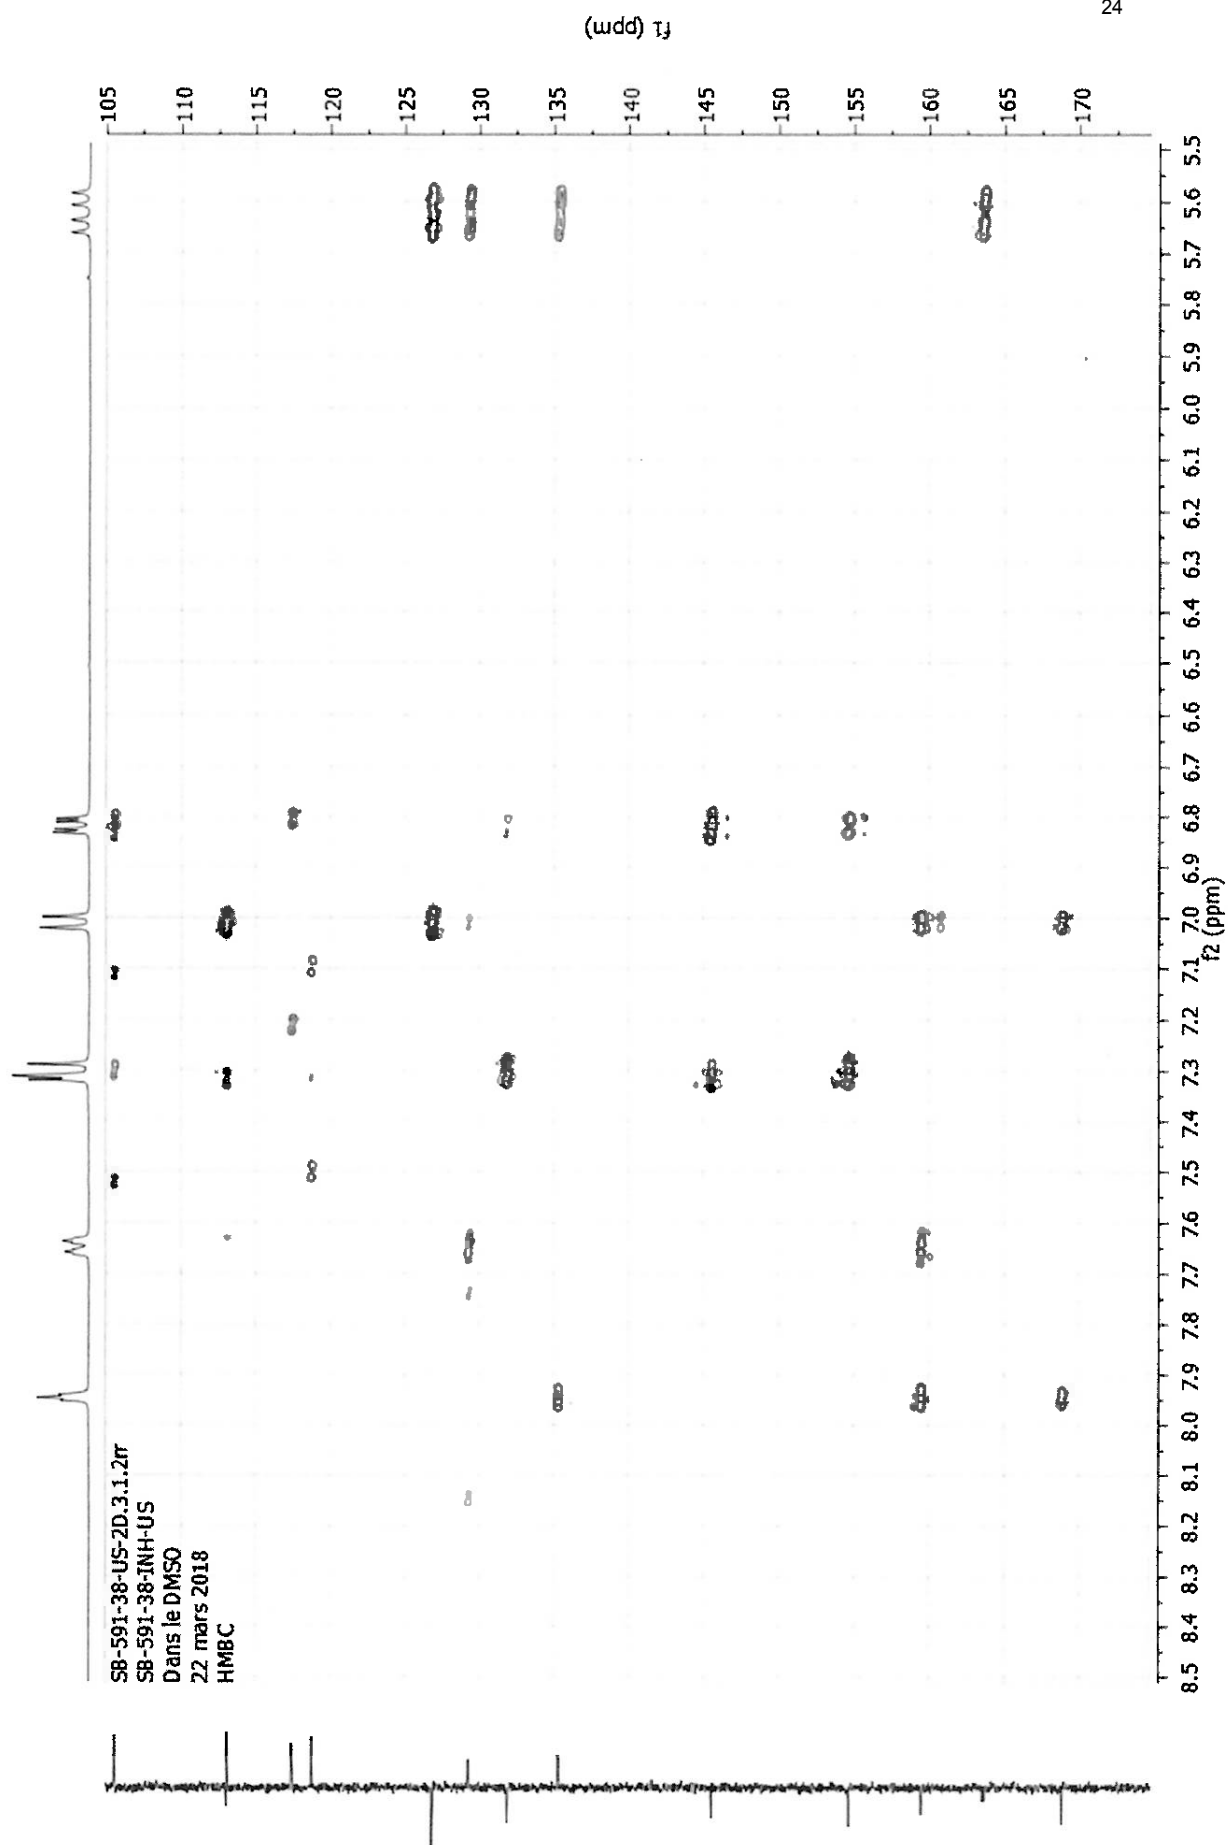

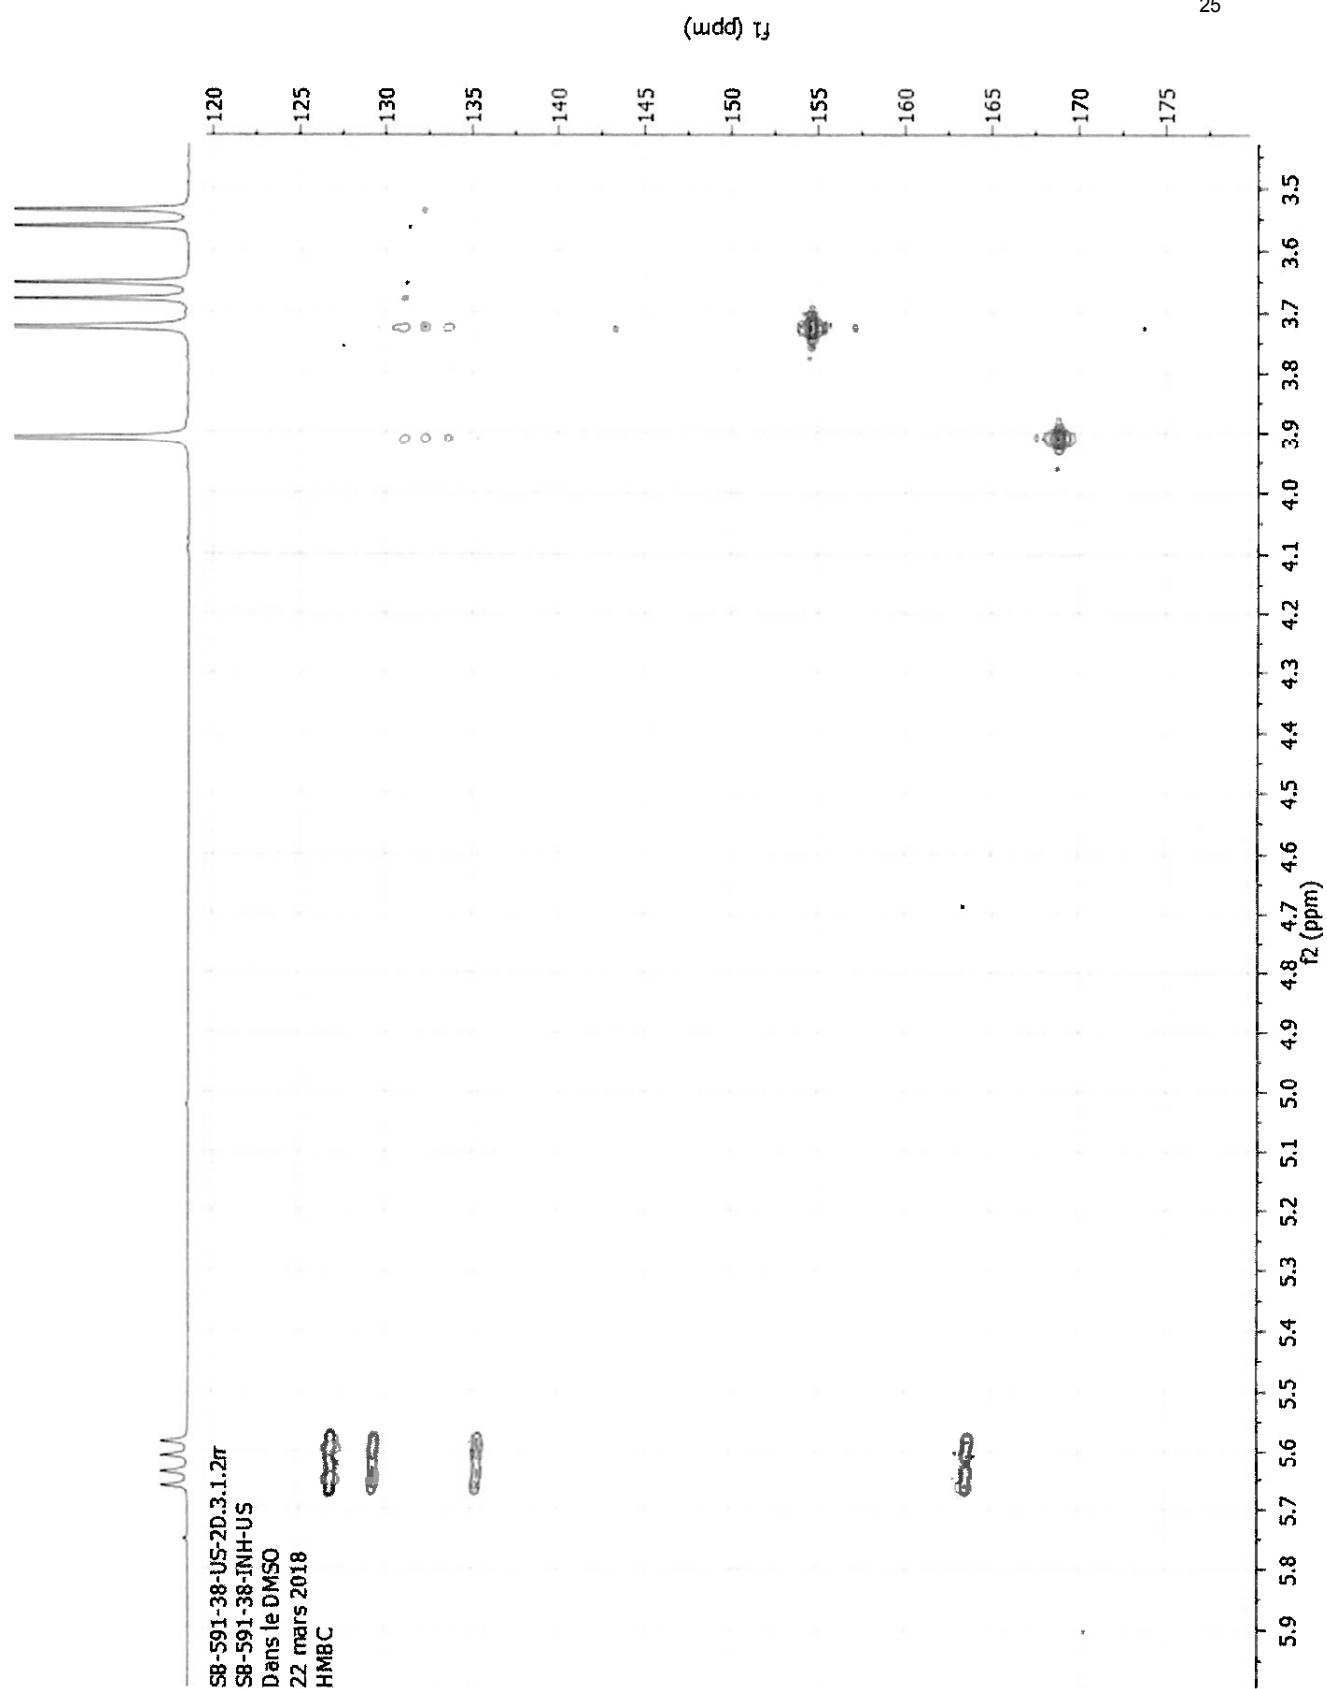



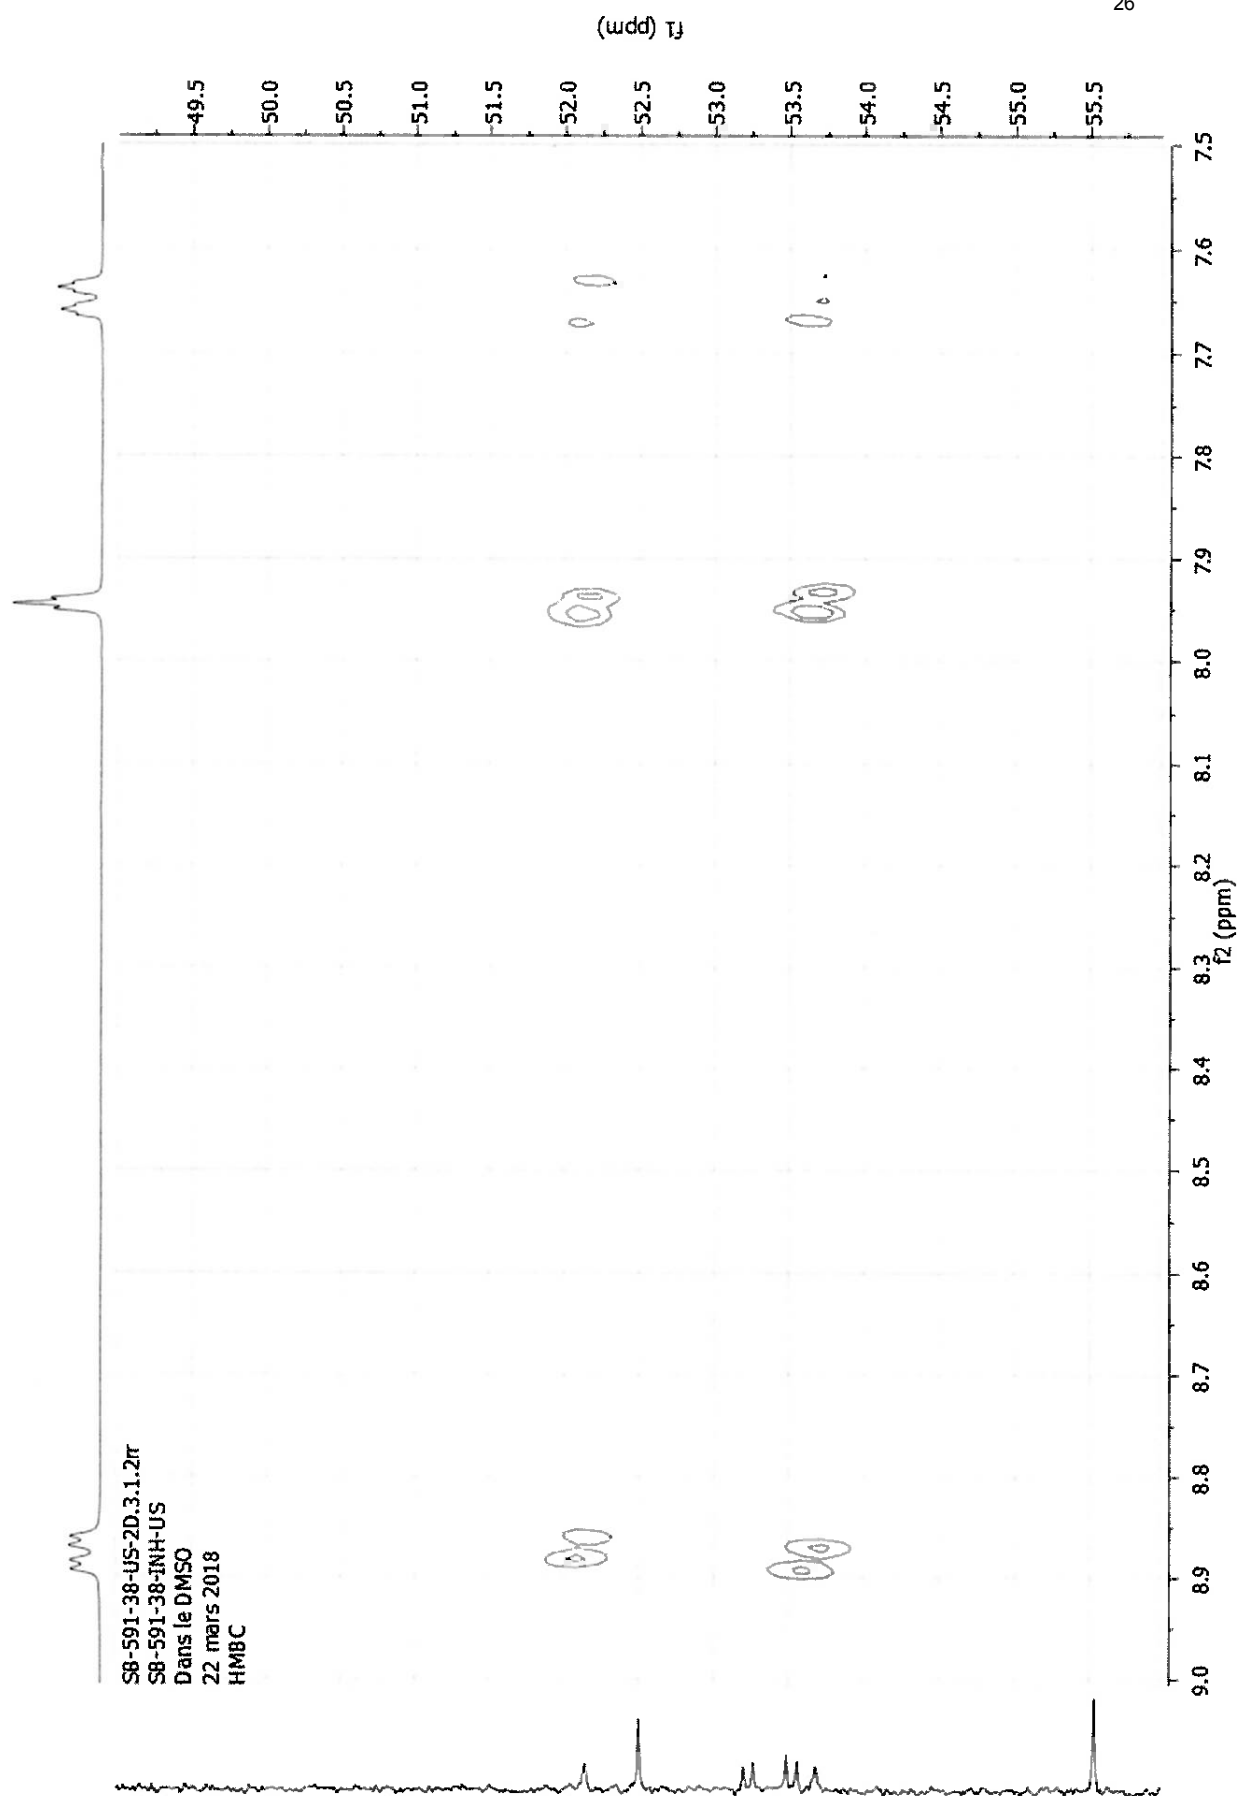

Supplement: s1 [file s1]
